1 **Community driven dynamics of oscillatory network responses to threat**

2  
3  
4 **Muthuraman, M<sup>1\*</sup>, Chirumamilla VC<sup>1\*</sup>, Koirala, N<sup>1</sup>, Anwar, AR<sup>2</sup>, Tüscher, O<sup>3</sup>,**  
5 **Vogt, J<sup>4</sup>, Horstmann, P<sup>3</sup>, Meyer, B<sup>5</sup>, Bonano, GA<sup>6</sup>, Gonzalez-Escamilla G<sup>1\*</sup>,**  
6 **Groppa, S<sup>1\*</sup>.**

7  
8 <sup>1</sup>Section of Movement Disorders and Neurostimulation, Biomedical Statistics and  
9 Multimodal Signal Processing unit, Department of Neurology, Focus Program  
10 Translational Neuroscience (FTN), University Medical Center of the Johannes  
11 Gutenberg-University Mainz, Mainz, Germany.

12 <sup>2</sup>Biomedical Engineering Centre, University of Engineering & Technology, Lahore  
13 (KSK Campus), Lahore, Pakistan

14 <sup>3</sup>Department of Psychiatry and Psychotherapy, University Medical Center of the  
15 Johannes Gutenberg-University Mainz, Mainz, Germany.

16 <sup>4</sup>Institute for Microscopic Anatomy and Neurobiology, University Medical Center,  
17 Johannes Gutenberg University Mainz, Mainz, Germany

18 <sup>5</sup>Neuroimaging Center, University Medical Center of the Johannes Gutenberg-  
19 University Mainz, Mainz, Germany.

20 <sup>6</sup>Teachers College, Columbia University, NewYork, USA.

21  
22  
23 \*These authors contributed equally.

24  
25  
26 Running title: Network flexibility during threat

27  
28  
29  
30  
31 Running title: Network flexibility during threat

32  
33 Number of Pages: 32

34 Number of Figures: 10

35 Number of Supplementary Tables: 4

36 Number of words Abstract: 150

37 Number of Supplementary Figures: 1

38

39

40

41

42

43

44 **Abstract**

45

46 Physiological responses to threat stimuli involve neural synchronized oscillations in  
47 cerebral networks with distinct organization properties. Community architecture within  
48 these networks and its dynamic adaptation could play a critical role in achieving  
49 optimal physiological responses.

50 Here we applied dynamic network analyses to address the early phases of threat  
51 processing at the millisecond level, describing multi-frequency (theta and alpha)  
52 integration and basic reorganization properties (flexibility and clustering) that drive  
53 physiological responses. We quantified cortical and subcortical network interactions  
54 and captured illustrative reconfigurations using community allegiance as essential  
55 fingerprints of large-scale adaptation.

56 A theta band driven community reorganization of key anatomical regions forming the  
57 threat network (TN) along with transitions of nodes from the dorsal attention (DAN)  
58 and salience (SN) circuits predict the optimal physiological response to threat. We  
59 show that increase flexibility of the community network architecture drives the  
60 physiological responses during instructed threat processing. Nodal switches  
61 modulate the directionality of information flows in the involved circuits.

62 These results provide a captivating perspective of flexible network responses to  
63 threat and shed new light on basic physiological principles relevant for the  
64 development of stress- and threat-related mental disorders.

65 Human responses to threat and stress necessitate highly adaptive but orchestrated  
66 responses in the involved brain circuits. Brain oscillations, which play a key role in the  
67 coordination of large-scale brain networks, drive physiological responses to threat,  
68 and their phase switches determine excitability states of the involved cerebral nodes  
69 <sup>1</sup>. Rapid, temporary shifts of excitability upon stressors involve orchestrated  
70 interactions between core components of the threat circuitry, namely the dorsomedial  
71 prefrontal cortex (dmPFC), hippocampus and amygdala. These regions could  
72 influence primarily adaptive characteristic responses of brain circuits to threat,  
73 facilitating coping behavior <sup>2</sup>. Addressing oscillatory activity in brain networks could  
74 delineate real-time processing and unmask involved network nodes illustratively  
75 describing the in-phase synchrony of brain oscillations, their states and relation to  
76 excitability regulation <sup>3</sup>.

77 The core network regions coordinating threat-processing influence the activity in the  
78 interconnected areas. Furthermore, the limbic regions of this threat circuit form part of  
79 networks mediating the detection and integration of behaviorally relevant stimuli, for  
80 instance the salience network (SN) <sup>4</sup>. Since the involved networks are highly variable  
81 and exhibit spontaneous but also task related dynamics <sup>5</sup>. Identification of the  
82 network properties related to threat processing and the specific interrelation among  
83 involved brain regions at different networks are of essential importance for  
84 understanding mental health related to physiological threat processing, while  
85 abnormalities in network associations could be directly and causally linked to mental  
86 disorders.

87 Our conceptual framework is motivated by recent theoretical advances in network  
88 science <sup>6</sup>. These approaches can characterize complex systems as brain responses  
89 by delineating components and mapping interactions between interconnected  
90 regions <sup>7</sup>. Addressing the dynamic modification of the networks at different scales  
91 allows us to deduce how information is processed between the nodes in the network.  
92 Resting state fMRI has been repeatedly used to characterize network dynamics  
93 during threat processing <sup>8</sup>. However, fMRI has, low temporal resolution in seconds,  
94 while brain oscillations occur in the millisecond range. Moreover, distinct processes  
95 possess a frequency specificity of their evoked responses that cannot be captured by  
96 fMRI. Therefore, Electroencephalography (EEG) is ideal to address oscillatory activity  
97 at the optimal temporal scale and could help us in the link with modern network

98 science brain responses<sup>9,10</sup>.  
99 Previous evidence suggests that in rodents, oscillations at the theta range (4–8 Hz)  
100 support amygdala-prefrontal coordination and contribute to physiological threat  
101 processing<sup>11,12</sup>. In non-human primates, the emergence of theta oscillations supports  
102 the synchronization of amygdala-to-prefrontal circuits, that serves as a mechanism  
103 for long-range communication and directional information transfer between  
104 subcortical and cortical structures during threat processing<sup>13</sup>. In humans, recent  
105 studies have shown prominent theta power increases in relation to threat processing  
106 at the prefrontal, frontal and midline channels, whereas alpha activity decrease was  
107 observed at the parietal and occipital channels<sup>14,15</sup>.  
108 To address the network dynamics behind threat induced brain responses, we looked  
109 for the community network characteristics that are described as properties of  
110 functionally specialized sub-networks. The latter are defined as groups of highly inter-  
111 connected nodes which have very few connections to nodes in different groups<sup>16,17</sup>.  
112 To capture the dynamic network information processing and behavior in these  
113 community networks, we combine several advanced computational algorithms.  
114 These include measures of clustering behavior, that capture the capacity to form  
115 triangular interconnected communities and flexibility measurements that mirror the  
116 extent to which these regions change their community allegiance over time. These  
117 measure can effectively tract network reorganization and efficiently quantify the ability  
118 to reconfigure to different task demands<sup>18</sup>.  
119 In the current study, we use an instructed threat paradigm in which the conditioned  
120 stimulus (CS+) is paired with an aversive unconditioned stimulus (US) to examine  
121 neural processing during threat<sup>19,20</sup>. Recent studies indicate that physiological  
122 responses to threat processing are depicted as increased cortical excitability at time  
123 intervals around 1000 milliseconds after the stimuli presentation. For this study, we  
124 selected two time points for the application of Transcranial magnetic stimulation  
125 (TMS) pulses: one before initiation of threat processing and one at a physiologically  
126 relevant time-window. In order to look at the causal network dynamics over a short  
127 temporal scale, we take advantage of the EEG ideal temporal resolution and use a  
128 non-linear state space modelling approach, which uses dual extended Kalman  
129 filtering (DEKF), in a method known as temporal partial directed coherence (TPDC)  
130 <sup>21,22</sup>.

131 We hypothesized that looking into simultaneous EEG-TMS data, while modulating  
132 threat processing through dmPFC stimulation at distinct time intervals, we could  
133 uncover local and global network changes at specific neuronal circuits, namely the  
134 DAN, SN and FN. Characterization of network reorganization at specific oscillations  
135 should also unveil drastic community changes, redefining information flows between  
136 nodes. In this line, we evaluate whether network re-configuration is depicted as a  
137 change in the region's assignment to a specific community, or whether network  
138 community structure directs the directionality of information flows in the involved  
139 circuits.

140

## 141 **Materials and Methods**

### 142 **Subjects**

143 45 healthy subjects (22 female, mean age  $28 \pm 5.48$  years) were included in our  
144 study. The study protocol was approved by local ethics committee (Medical faculty,  
145 Johannes Gutenberg University of Mainz) and informed written consent was taken  
146 from all participants before the beginning of experiment. All the participants had two  
147 visits to the lab, in which during the first visit MRI data was acquired. During the  
148 second visit, an instructed threat paradigm (in experiment 1) or an instructed threat  
149 paradigm with TMS (experiment 2) was performed.

150

### 151 **MRI data acquisition**

152 Images were acquired using a 3 Tesla MRI scanner (Magnetom Tim Trio, Siemens  
153 Healthcare, Erlangen, Germany) equipped with 32-channel head coil at the  
154 Neuroimaging Center (NIC) Mainz, Germany. A Magnetization-prepared rapid  
155 gradient-echo (MP-RAGE) sequence (Repetition Time [TR] = 1900ms; Echo Time  
156 [TE] = 2.54ms; Inversion Time [IT] = 900; Pixel Bandwidth = 180; Acquisition Matrix =  
157 320, 320; Flip Angle =  $9^\circ$ ; voxel size = 0.8125, 0.8125 mm; Slice Thickness = 0.8  
158 mm) was used.

159

### 160 **Experiment 1 (instructed threat task)**

161 First, subjects (N=19, 11 female, mean age  $27.4 \pm 4.32$  years) were asked to sit in a  
162 chair and painful electric stimuli were applied to the dorsal part of left hand using a  
163 surface electrode connected to a DS7A electrical stimulator (Digitimer). Individual

164 pain ratings on a scale from 0 (no pain) to 10 (intense pain) were acquired. An  
165 intensity representing a pain level of 7 was used during the experiments. The  
166 instructed threat task was developed using the Cogent toolbox  
167 ([http://www.vislab.ucl.ac.uk/cogent\\_2000.php](http://www.vislab.ucl.ac.uk/cogent_2000.php)) in Matlab 2006B (MathWorks). The  
168 task consisted of presenting two visual stimuli: circle and square (**Fig 1 A**); and a  
169 fixation cross during the inter-trial interval (ITI) (**Fig 1 B**). Participants were instructed  
170 that the circle stimulus (CS+) is associated with the electric shock (UCS) with a  
171 probability of 33% randomized between (1- 5 seconds) at the time the stimulus is  
172 presented on screen; while stimulus square (CS-) is not associated with any threat.  
173 Stimuli were presented pseudo-randomly on screen for 5 sec and the ITI was jittered  
174 between 4 and 6 sec. The paradigm consisted of 60 stimuli (36 CS+, 24 CS-). High-  
175 density EEG was recorded from 256 channels throughout the experiment (Net  
176 Station 5.0, EGI, USA). Electrode impedances were kept under 50 K $\Omega$  during the  
177 whole experiment. A sampling frequency of 250 Hz was used. This study was divided  
178 into 3 sessions, where each session lasted for around 5 minutes and 3 min breaks  
179 were provided in between sessions. After each session the level of experienced  
180 threat was rated in a scale from 1 to 10 by each participant with a questionnaire.

181

## 182 **Experiment 2 (instructed threat task with concomitant dmPFC-TMS)**

183 To evaluate the involvement of the dmPFC in threat processing and network  
184 dynamics, a second experiment (Experiment 2) was conducted in another cohort of  
185 healthy subjects (N=26, 11 female, mean age  $28.6 \pm 6.64$  years) that includes the  
186 instructed threat task as in experiment 1 together with application of single TMS  
187 pulses over the right dmPFC, after 1 sec from stimulus onset. The MNI (Montreal  
188 Neurological Institute) coordinate for the dmPFC ([10 12 58]) was obtained from a  
189 previous fMRI study (1). Individual coordinates were determined using the  
190 corresponding MRI in SPM8 (<http://www.fil.ion.ucl.ac.uk/spm>). Location of TMS  
191 pulses delivery, coil position and orientation were controlled throughout the  
192 experiment using a neuronavigation system (Localite TMS navigator, Germany). At  
193 the stimulation site the TMS coil was placed tangentially to the scalp surface and  
194 oriented in a medial to lateral position at a 45° angle away from the midline with the  
195 handle pointing backwards. TMS pulses were applied in biphasic pulse configuration  
196 using a figure-8 coil connected to Magstim Rapid<sup>2</sup> (Magstim, UK). The intensity of

197 TMS pulses was set to 110% RMT (resting motor threshold). RMT was calculated as  
198 the minimum stimulus intensity required eliciting motor evoked potentials of amplitude  
199  $50 \mu V$  in 5 out of 10 consecutive trials at rest<sup>23</sup>. The paradigm consisted of 90  
200 stimuli (54 CS+, 36 CS-). The condition specific (CS-: no threat, CS+: threat) trials  
201 were considered and the trials in which shock was applied were removed from the  
202 analyses. We repeated the experiment 2 but applying TMS at 80ms as a control  
203 experiment for TMS modulation on the network dynamics (**Fig 1 B**). Subjective threat  
204 ratings were also acquired in experiment 2.

205

### 206 **EEG data preprocessing**

207 EEG data preprocessing and part of the spatial filter analyses were analyzed using  
208 MATLAB2015a and the fieldtrip toolbox<sup>24</sup>. The data used in the initial preprocessing  
209 steps were blind to researcher. Initially, EEG data was re-referenced to the common  
210 grand average reference of all EEG channels and epoched from  $-2.0$  to  $4.0$  s (0 -  
211 being the visual stimuli). These epoch trials were used for the purpose of filtering  
212 only, for all subsequent analyses the time interval for the epochs was  $-0.25$  to  $1.5$  s.  
213 The preprocessing pipeline was adapted from the Fieldtrip toolbox explained detail in  
214<sup>19</sup>. For experiment 1, the EEG data was directly subjected to independent component  
215 analyses (FastICA) to remove the components representing the muscle artifacts, eye  
216 blinks, eye movements and line noise. For experiment 2, TMS-EEG data, a period of  
217  $-5$  to  $20$  ms relative to the TMS pulse was first cut out and excluded to remove the  
218 ringing artifact. The pre-ringing and post-ringing epochs were subject to independent  
219 component analysis (FastICA) to remove the components representing the  
220 exponential decay artifact, residual muscle artifacts, eye blinks, eye movements, line  
221 noise and other muscle artifacts unrelated to TMS. On average for the experiment 1,  
222 30 of 256 components ( $30 \pm 4.6$ , mean  $\pm$  SD) were rejected, 10-11 were related to  
223 the eye artifacts ( $11 \pm 2.68$ ), 5-6 related to line noise ( $5 \pm 2.34$ ) and 12-13 were  
224 related to muscle artifacts ( $12 \pm 1.24$ ). For the experiment 2, 36 of 256 components  
225 ( $36 \pm 2.3$ , mean  $\pm$  SD) were rejected, 2-3 were related to the exponential decay ( $2 \pm$   
226  $0.74$ ), 4-5 related to line noise ( $4 \pm 1.98$ ), 13-14 were related to muscle artifacts ( $13 \pm$   
227  $1.16$ ) and 13-14 were related to the eye artifacts ( $13 \pm 1.04$ ). The residual muscle  
228 artifacts were visually inspected, removed and interpolated with the cubic  
229 interpolation method. A fourth-order Butterworth low-pass filter with a cut-off



230 frequency of 200 Hz was applied to avoid aliasing, which was followed by a band  
231 pass filtered between 3 and 45 Hz.

232

### 233 **Heart rate estimation**

234 The heart rate estimation was extracted from the EEG signals using the extended  
235 version of the independent component analysis (ICA) algorithm, based on information  
236 maximization<sup>14</sup> as previously reported<sup>9</sup>. In the EEG signals, volume conduction is  
237 thought to be linear and instantaneous, and it is expected that the sources of cardiac  
238 signals are not generally time locked to the sources of EEG activity, reflecting the  
239 activity of cortical neurons<sup>25</sup>. The ICA can accurately identify the time courses of  
240 activation and scalp topographies of relatively large and temporally-independent  
241 sources from simulated scalp recordings, even in the presence of a large number of  
242 low-level and temporally-independent source activities<sup>26</sup>.

243 For heart rate detection analysis, the rows of the input matrix  $y$  are the EEG signals  
244 recorded at the 256 electrodes, the rows of the output data matrix  $v = X y$  are time  
245 courses of activation of the ICA components, and the columns of the inverse matrix,  
246  $X^{-1}$ , give the projection strengths of the respective components onto the scalp  
247 sensors.

248 In general, and unlike PCA, the component time courses of activation will be non-  
249 orthogonal. Corrected EEG signals can then be derived as  $y' = (X)^{-1} v'$ , where  $v'$  is  
250 the matrix of activation waveforms,  $v$ , with rows representing sources of cardiac  
251 artifacts which are then extracted for further estimations from each participant. In total  
252 for experiment 1 we concatenated the 36 CS+ trials to take a total of 180 seconds  
253 and 24 CS- trials to take 120 seconds. For experiment 2 we concatenated the 54  
254 CS+ trials to take 270 seconds and 36 CS- trials to take 180 seconds.

255

### 256 **Reliability check of the EEG signals using inter-trial phase coherence (ITPC)** 257 **analyses**

258 Single trial data were first decomposed into their time-frequency representation by  
259 using the multitaper method<sup>27</sup>. In this method the spectrum is estimated by  
260 multiplying the data with  $K$  different windows (i.e. tapers). In this study,  $K = 7$   
261 orthogonal tapers were used with good leakage and spectral properties, the discrete  
262 prolate spheroidal sequences (DPSS) are applied<sup>28</sup>. ITPC were computed using the



263 Fieldtrip toolbox<sup>24</sup>. ITPC reflects the consistency of the phase values across trials, at  
264 different frequencies, and at single electrodes. The electrodes were grouped in line  
265 with the five lobes to have a global robust measure over a certain lobe instead of  
266 selecting certain electrodes. The ITPC was estimated in two frequency bands  
267 separately namely theta (4-7 Hz) and alpha (8-13 Hz). This measure is stimulus-  
268 locked and independent of amplitude changes. A value of 0 represents absence of  
269 synchronization and a value of 1 indicates perfect synchronization. The baseline  
270 activity was taken as a reference, and was calculated as the average at each  
271 frequency band and across conditions, from -250 to 0 ms before visual stimuli. The  
272 change with respect to the baseline interval at 6 windows of 250 ms each after the  
273 visual stimulus was then extrapolated up to 1500 ms. Finally, the ITPC difference  
274 between the CS+ and CS- was estimated. The significance levels of the ITPC are  
275 assessed using surrogate data by randomly shuffling 1000 times the single-trial  
276 spectral estimates from different latency windows during the baseline period.

277

### 278 **Reconstruction of brain activity**

279 The forward problem is the computation of the scalp potentials for a set of neural  
280 current sources. An established procedure was used by estimating the lead-field  
281 matrix with specified models for the brain; a volume conduction model with a finite-  
282 element method (FEM) is used<sup>29</sup>. For the forward modelling the surfaces of the  
283 compartments like the skin, skull, csf, gray, and white matter extracted from the  
284 individual T1 MRI, and individual electrode locations were used. The forward  
285 modeling and the source analysis were done in FieldTrip<sup>24</sup>. The lead-field matrix  
286 (LFM) contains information about the geometry and conductivity of the model. The  
287 complete description of the solution for the forward problem has been described  
288 previously<sup>30</sup>. A full description of the beamformer linear constrained minimum  
289 variance spatial filter is given elsewhere<sup>31</sup>. The output of the beamformer at a voxel  
290 in the brain can be defined as a weighted sum of the output of all EEG channels. The  
291 weights determine the spatial filtering characteristics of the beamformer and are  
292 selected to increase the sensitivity to signals from a voxel and reduce the  
293 contributions of signals from (noise) sources at different locations. The frequency  
294 components and their linear interaction are represented as a cross-spectral density  
295 (CSD) matrix. In order to visualize power at a given frequency range, a linear

296 transformation was used based on a constrained optimization problem, which acts as  
297 a spatial filter<sup>32</sup>. The spatial filter assigned a specific value of power to each voxel.  
298 For a given source the beamformer weights for a location of interest are determined  
299 by the data covariance matrix and the LFM. A voxel size of 5 mm was used in this  
300 study, resulting in 6676 voxels covering the entire brain. The created source model  
301 was then interpolated on the brain regions defined according to the Automatic  
302 Anatomic Labeling Atlas (AAL) 90 cortical regions of interest (ROIs) defined in the  
303 MNI space<sup>33</sup>. For each frequency band (theta and alpha) the activated voxels were  
304 selected by a within-subject surrogate analysis to define the significance level, which  
305 was then used to identify voxels in the regions as activated voxels. Once the brain  
306 region voxels were identified, their activity was extracted from the source space. In a  
307 further analysis, all the original source signals for each AAL region with several  
308 activated voxels were combined by estimating the second order spectra and  
309 employing a weighting scheme depending on the analyzed frequency range to form a  
310 pooled source signal estimate for each region as previously described separately for  
311 both stimulus (CS+, CS-) <sup>34</sup>. Finally, the time series difference between the two  
312 conditions (CS+, CS-) was obtained for all the following analyses.

313

### 314 **Evaluating dynamic re-organization of the brain networks**

315 Based on the reconstructed brain activity, individual weighted connectivity matrices  
316 were obtained for theta and alpha power separately, and for the same 90 regions of  
317 interest defined in the AAL atlas. The links or entries in the connectivity matrix  
318 represent the theta or alpha power that is in each ROI( $j$ ) to all other ROIs( $i$ ). The  
319 weighted connectivity matrices were then characterized using various network  
320 measures (see below) as implemented in the brain connectivity toolbox<sup>35,36</sup> and the  
321 dynamics graph metrics toolbox<sup>37</sup>.

322 The communities were identified using the Louvain modularity algorithm<sup>38</sup> in each  
323 individual subject connectivity matrix. To test the robustness of the detected  
324 community association at the baseline interval (-250 to 0 ms), we performed 5000  
325 iterations with the Louvain algorithm where the assignment of each region to a  
326 particular community was based on the maximum number of times/iteration a region  
327 was assigned to a community<sup>39</sup>. During this process  $\gamma$ , which is the resolution  
328 parameter, was varied from (1 to 2.5) in steps of 0.05 to identify a stable  $\gamma$  value to

329 use in the further time intervals. This procedure was repeated for all the other  
330 following intervals from (0 ms to 1500 ms) each within a 250 ms window after the  
331 visual stimulus (T1 to T6), with a stable ( $\gamma = 1.65$ ) to detect the different communities.

332

### 333 **Measures of community efficiency**

334 We assessed three network measures for each formed community: flexibility,  
335 clustering coefficient and local efficiency. These measures characterize the efficiency  
336 of information transfer at different levels (global and local). To measure changes in  
337 the composition of communities<sup>36</sup>, the flexibility of a node is defined to be the  
338 number of times that a node changed community assignment throughout the entire  
339 session, normalized by the total number of changes that were possible (i.e., by the  
340 number of consecutive pairs of layers in the multilayer framework). We then defined  
341 the flexibility of the entire community as the mean flexibility over the nodes in that  
342 particular community. The clustering coefficient (C) is a parameter of local  
343 organization<sup>40</sup> reflecting the number of connections between directly neighboring  
344 nodes (the topological motif of a triangle), with sparsely interconnected regions  
345 showing lower values. The efficiency of a network primarily reflects how information  
346 is exchanged between the regions. Local efficiency<sup>41</sup> quantifies a network's  
347 resistance to failure on a small scale and is defined as the inverse of the length of the  
348 shortest path in the node. For the three network parameters, twenty density intervals  
349 (range 0.1–0.6) were calculated, over which we estimated the mean and standard  
350 deviation. The range was chosen in such a way that the network was fully connected  
351 at the minimum value and fully disconnected at the maximum value<sup>42</sup>.

352

### 353 **Investigating causal relationships between network nodes**

354 The effective connectivity analysis was performed on all the nodes separately, for  
355 each of the three new communities and each frequency separately. Using time-  
356 frequency causality, is possible not only to focus on a particular frequency, but also to  
357 analyze the dynamics of the causality at that frequency. The time-frequency causality  
358 estimation using the TPDC is based on dual extended Kalman filtering (DEKF)<sup>43</sup>,  
359 and allows time-dependent auto regressive (AR) coefficients to be estimated. One  
360 EKF estimates the states and feeds this information to the other; the second EKF  
361 estimates the model parameters and shares this information with the first. By using

362 two Kalman filters working in parallel with one another, we can estimate both states  
363 and model parameters of the system at each time instant. After estimating the time-  
364 dependent multivariate (MVAR) coefficients, the next step is to use those coefficients  
365 for the calculation of causality between the time series. By calculating the time-  
366 dependent MVAR coefficients at each time point, we can also calculate partial  
367 directed coherence (PDC) at each time point. The frequency bands taken into  
368 account were the theta and alpha. After estimating the TPDC values the significance  
369 level was calculated from the applied data using a bootstrapping method <sup>44</sup>. In short,  
370 we divide the original time series into smaller non-overlapping windows and randomly  
371 shuffle the order of these windows to create a new time series. The MVAR model is  
372 fitted to the shuffled time series and TPDC is estimated. The bootstrapping is  
373 performed 1000 times and the average TPDC value is taken as the significance  
374 threshold for all our connections. This process is performed separately for each  
375 participant. The resulting value is the significance threshold value for all our  
376 connections. This process is performed separately for each subject. In this study the  
377 open source Matlab package autoregressive fit (ARFIT)<sup>45</sup> was used for estimating the  
378 autoregressive coefficients from the spatially filtered source signals of the identified  
379 nodes in the three new communities. We applied time reversal technique TRT <sup>46</sup> as a  
380 second significance test on the connections already identified by TPDC using a data-  
381 driven bootstrapping surrogate significance test. We have previously applied this type  
382 of non-linear time-frequency causality both in EEG <sup>22,31</sup> and functional modality  
383 datasets <sup>21</sup>.

384

### 385 **Statistical analyses**

386 We checked the normality of the data using the Shapiro-Wilk test and the sphericity  
387 was checked with Mauchly's sphericity test. The behavioral (threat) ratings and the  
388 heart rate values were tested for significance ( $p < 0.01$ ) between the two stimuli CS+  
389 and CS- using paired T-test. The three network measures for each of the three  
390 networks and two experiments were tested for significance separately using a two-  
391 way factorial ANOVA, within subject factor ( $n=2$ ; conditions, time). The TPDC values  
392 between the regional source signals were tested for significance using a paired T-  
393 test. The significant differences were tested for each frequency, each community and

394 from each two following time windows separately (for ex: baseline Vs T1; T1 Vs T2;  
395 T2 Vs T3; T3 Vs T4; T4 Vs T5; T5 Vs T6).

396 The Pearson correlation coefficient was estimated between the behavioral ratings  
397 (difference between CS+ and CS-) and the heart rate (difference between CS+ and  
398 CS-). Finally the network parameters and the effective connectivity values from all the  
399 time windows (T1-T6) were correlated separately with the behavioral ratings and the  
400 heart rate. The Bonferroni correction was performed for all the post-hoc tests and  
401 was considered significant at  $p < 0.05$ .

402

## 403 **Results**

404 We began by asking whether regions of the brain change their community attribution  
405 at theta and alpha frequency bands derived from high-density EEG during threat  
406 processing. We then examined three parameters of network organization (flexibility,  
407 clustering and local efficiency). We finally studied whether dynamic network  
408 characteristics using effective connectivity measures can be reliably traced during  
409 threat processing in healthy subjects, and searched for associations between  
410 network dynamics, behavioral and electrophysiological responses during threat  
411 processing.

412

413 **Behavioral quantification of threat states and heart rate analyses.** The  
414 behavioral ratings of threat were higher in the threat (CS+) condition when compared  
415 to the no-threat (CS-) condition ( $p < 0.001$ ; **Fig. 2A**). The estimated heart rate  
416 showed clear increases for the CS+ compared to the CS- ( $p < 0.001$ ; **Fig. 2B**).  
417 Primary behavioral effects from experiment 1 (no TMS) were replicated in experiment  
418 2 (TMS) for both increased ratings to CS+ ( $p < 0.001$ ; **Fig. 2A**) and heart rates ( $p <$   
419  $0.001$ ; **Fig. 2B**).

420 The correlation analyses between heart rate and threat ratings showed significant  
421 associations in both experiment 1 ( $r = 0.56$ ;  $p = 0.002$ ) and experiment 2 ( $r = 0.49$ ;  $p$   
422  $= 0.005$ ).

423

424 **Threat processing related inter-trial phase coherence changes.** The frontal theta  
425 showed a significant inter-trial phase coherence (ITPC) increase in between the  
426 baseline (-250-0 ms) and the four subsequent time windows from (0 to 1000 ms)

427 (experiment 1  $p < 0.001$ ; experiment 2  $p < 0.001$ ; **Fig. 3**). The occipital alpha showed  
428 decreased ITPC between the two conditions (CS+ and CS-) but the difference was  
429 only significant between the baseline (-250-0 ms) and the subsequent three time  
430 windows from (0-750 ms) in both experiment 1 ( $p < 0.001$ ) and experiment 2 ( $p <$   
431  $0.001$ ). The ITPC in the theta frequency showed an inverted U-shape like temporal  
432 pattern, increase in the first two windows (0-250 and 250-500 ms) and then reduced  
433 in the two subsequent time windows (500-750 and 750-1000 ms) in both  
434 experiments. The increase in ITPC of the frontal lobe showed the robust nature of the  
435 oscillatory response of each trial for the threat processing stimuli. The occipital alpha  
436 showed the opposite behavior, a decrease in the first two windows (0-250 and 250-  
437 500 ms) after the visual stimuli followed by an increase in the time windows 500-750  
438 and 750-1000 ms also in both experiments. The decrease of ITPC in the occipital  
439 lobe showed the specificity of attention for threatening stimuli.

440

441 **TMS induced inter-trial phase coherence changes.** In experiment 2 the ITPC at  
442 the theta band was perturbed by the TMS in the dmPFC at 1000 ms and induced a  
443 significant increase ( $p < 0.01$ ) in the frontal theta but did not affect the occipital alpha  
444 (**Fig. 3**). We were able to modulate the ITPC using TMS at the dmPFC in the frontal  
445 lobe during the time interval of threat processing. The control experiment of TMS at  
446 80 ms did not induce any significant change in the frontal lobe indicating choosing  
447 the correct temporal window for perturbation is vital.

448

449 **Network communities of the source signals.** The community detection analyses at  
450 both the theta and the alpha bands identified nine modules during the baseline  
451 interval (-250 to 0 ms; **Fig. 4**). The configuration of the communities was anatomically  
452 differentiated, namely community 1 comprised frontal regions; community 2 included  
453 basal ganglia; community 3 and community 7 encompassed fronto-parietal regions.  
454 Community 4 and community 5 included parietal and occipital regions respectively;  
455 whereas all the temporal regions were incorporated in community 6. Community 8  
456 included sensorimotor regions and community 9 comprised hippocampus and  
457 amygdala. When testing the robustness of the community association, this was  
458 stable over the 5000 iterations, i.e., the regions were assigned to the exact same  
459 community in  $80 \pm 6\%$  of the iterations.



460 After the visual stimuli in the experiment time windows 0 to 1500 ms all the nodes  
461 from the community 4 did not change the nodal alliance (Supplementary Table 1).  
462 However, in all the other communities either all the nodes as in community 5 or only  
463 some nodes altered their alliance to the known communities. The three well-known  
464 communities were the dorsal attention (DAN), salience (SN) and threat (TN)  
465 networks. The nodes that altered the community are marked in three different colors  
466 namely red for DAN, blue for SN and green for FN representing each of these three  
467 networks (**Supplementary Table 1**).

468

469

470 **Temporal changes in network organization within** communities. In the theta band  
471 from the three formed networks, the dorsal attention network (**Fig. 5A**) showed  
472 significantly increased flexibility in the experiment 1, factor condition ( $F_{1,18} = 22.67$ ,  $p$   
473  $< 0.001$ ) and factor time ( $F_{6,108} = 12.24$ ,  $p < 0.001$ ); and in experiment 2, factor  
474 condition ( $F_{1,25} = 20.45$ ,  $p < 0.001$ ) and time ( $F_{6,150} = 14.87$ ,  $p < 0.001$ ). The post-hoc  
475 analyses showed significantly higher flexibility for windows from (0 to 1500 ms) in  
476 comparison to the baseline window (-250-0 ms) ( $p < 0.001$  for all windows; **Fig. 5B**).  
477 In experiment 2, the window 1000-1250 ms showed a decrease in flexibility with  
478 respect to the window 750-1000 ms ( $p < 0.001$ ). In the alpha frequency band the  
479 regions of the DAN showed no flexibility changes with respect to the baseline (-250-0  
480 ms) in both experiments. A flexibility increase in the window 1000-1250 ms in  
481 comparison to 750-1000 ms window was observed ( $p < 0.001$ ) in experiment 2.

482 The clustering coefficient (**Fig. 5C**) also showed significant increases in the theta  
483 frequency band in experiment 1, factor condition ( $F_{1,18} = 38.74$ ,  $p < 0.001$ ) and time  
484 ( $F_{6,108} = 19.57$ ,  $p < 0.001$ ) and experiment 2, factor condition ( $F_{1,25} = 34.21$ ,  $p < 0.001$ )  
485 and time ( $F_{6,150} = 17.24$ ,  $p < 0.001$ ). The post-hoc analyses revealed no significant  
486 differences between baseline (-250-0 ms) and all the experiment windows from 0 to  
487 1500 ms ( $p > 0.05$  for all time intervals). The alpha band showed no time changes  
488 with respect to the window -250-0 ms in both experiments. An increase of clustering  
489 coefficient was detected for the window 1000-1250 ms in comparison to 750-1000  
490 ms,  $p = 0.006$ ) in experiment 2.

491 The network local efficiency (**Fig 5D**), was increased in the theta band in experiment  
492 1, factor condition ( $F_{1,18} = 42.28$ ,  $p < 0.001$ ) and time ( $F_{6,108} = 23.27$ ,  $p < 0.001$ ) and



493 experiment 2, factor condition ( $F_{1,25} = 39.65$ ,  $p < 0.001$ ) and time ( $F_{6,150} = 19.38$ ,  $p <$   
494  $0.001$ ), from -250-0 ms to the 0-1500 ms windows. Only in the experiment 2 (TMS) a  
495 significant decrease was observed for the 750-1000 ms)window in comparison to  
496 1000-1250 ms ( $p < 0.001$ ). In the alpha band the experiment windows (0 to 1500 ms)  
497 did not differ from baseline window (-250-0 ms) in both experiments, only an  
498 increase for the interval (1000-1250 ms) from (750-1000 ms) was significantly  
499 different ( $p < 0.05$ ) in both experiments.

500

501 The regions forming the salience network (**Fig 6A**) showed significant flexibility  
502 increases (**Fig 6B**) in the theta band for the experiment 1, factor condition ( $F_{1,18} =$   
503  $12.67$ ,  $p = 0.002$ ) and time ( $F_{6,108} = 4.24$ ,  $p = 0.001$ ) and in experiment 2, factor  
504 condition ( $F_{1,25} = 9.24$ ,  $p = 0.006$ ) and time ( $F_{6,150} = 5.87$ ,  $p < 0.001$ ). The post-hoc  
505 analyses revealed significant differences between (-250-0 ms) and the windows (0 to  
506 1500 ms) ( $p < 0.001$  for all time intervals) in both experiments. In experiment 2 the  
507 interval 1000-1250 ms showed a significant flexibility increase ( $p < 0.001$ ) with  
508 respect to the previous interval 750-1000 ms. In the alpha band a decrease in  
509 flexibility was observed in the experiment 1, factor condition ( $F_{1,18} = 8.48$ ,  $p = 0.01$ )  
510 and time ( $F_{6,108} = 3.68$ ,  $p = 0.009$ ) and in experiment 2, factor condition ( $F_{1,25} = 5.45$ ,  
511  $p = 0.03$ ) and time ( $F_{6,150} = 2.86$ ,  $p = 0.01$ ). An increase of flexibility was also  
512 observed for the interval 1000-1250 ms in comparison to 750-1000 ms, which was  
513 only significant in experiment 2 ( $p < 0.001$ ).

514 The clustering coefficient (**Fig 6C**) of the theta band also showed significant  
515 increases in the experiment 1, factor condition ( $F_{1,18} = 10.54$ ,  $p = 0.005$ ) and time  
516 ( $F_{6,108} = 3.64$ ,  $p = 0.008$ ) and experiment 2, factor condition ( $F_{1,25} = 8.46$ ,  $p = 0.009$ )  
517 and time ( $F_{6,150} = 3.72$ ,  $p = 0.008$ ). The post-hoc analyses showed clustering  
518 increases at all the time intervals from 0 to 1500 ms with respect to the -250-0 ms ( $p$   
519  $< 0.01$  - for all time intervals). In experiment 2 the window 1000-1250 ms showed a  
520 significant increase ( $p < 0.001$ ) in the flexibility with respect to 750-1000 ms. In the  
521 alpha band no significant changes in respect to baseline -250-0 ms were detected in  
522 experiment 1 or experiment 2. The increase in clustering coefficient for the interval  
523 1000-1250 ms from 750-1000 ms was significant ( $p < 0.001$ ) only for the experiment  
524 2.

525 The local efficiency (**Fig 6D**), reflecting network resistance to failure, was increased  
526 in the theta band of experiment 1, factor condition ( $F_{1,18} = 11.25$ ,  $p = 0.003$ ) and time  
527 ( $F_{6,108} = 4.78$ ,  $p < 0.001$ ) and experiment 2, factor condition ( $F_{1,25} = 11.45$ ,  $p = 0.002$ )  
528 and time ( $F_{6,150} = 5.46$ ,  $p < 0.001$ ). Post-hoc analyses revealed differences at all time-  
529 windows from 0 to 1500 ms with respect to the -250-0 ms window ( $p < 0.01$  for all  
530 time intervals). However, significant local efficiency increases were detected for the  
531 interval 750-1000 ms in respect to 1000-1250 ms ( $p < 0.01$ ) only in the experiment 2  
532 (TMS). The alpha band showed significantly decreased local efficiency in the  
533 experiment 1, factor condition ( $F_{1,18} = 9.24$ ,  $p = 0.007$ ) and time ( $F_{6,108} = 2.78$ ,  $p =$   
534  $0.01$ ) and experiment 2, factor condition ( $F_{1,25} = 9.22$ ,  $p = 0.006$ ) and time ( $F_{6,150} =$   
535  $3.18$ ,  $p = 0.008$ ). The post-hoc analyses showed significant increases in the windows  
536 from 0 to 1500 ms in comparison to -250-0 ms ( $p < 0.01$  for all windows).

537 The regions of threat network (**Fig 7A and B**), showed significant changes only in the  
538 theta band and no significant changes was observed in the alpha band from (-250-0  
539 ms) to the following time windows (0 to 1500 ms). This network showed significantly  
540 increased flexibility in the theta frequency of experiment 1, factor condition ( $F_{1,18} =$   
541  $15.42$ ,  $p = 0.001$ ) and time ( $F_{6,108} = 7.65$ ,  $p < 0.001$ ) and experiment 2, the factor  
542 condition ( $F_{1,25} = 15.53$ ,  $p < 0.001$ ) and time ( $F_{6,150} = 8.96$ ,  $p < 0.001$ ). Post-hoc  
543 analyses revealed higher flexibility in windows (0 to 1500 ms) compared to (-250-0  
544 ms) ( $p < 0.001$  for all windows in both experiments). In experiment 2 the (1000-1250  
545 ms) showed a significant flexibility increases with respect to (750-1000 ms) ( $p <$   
546  $0.001$ ).

547 The clustering coefficient (**Fig 7C**) also showed a significant theta band increases in  
548 the experiment 1, factor condition ( $F_{1,18} = 16.21$ ,  $p < 0.001$ ) and time ( $F_{6,108} = 9.47$ ,  $p$   
549  $< 0.001$ ) and experiment 2, factor condition ( $F_{1,25} = 17.24$ ,  $p < 0.001$ ) and time ( $F_{6,150}$   
550  $= 7.67$ ,  $p < 0.001$ ). Post-hoc analyses comparing the (-250-0 ms) and the experiment  
551 windows (0 to 1500 ms) showed significant increase ( $p < 0.001$  for all time intervals).  
552 In experiment 2 the interval (1000-1250 ms) showed a significant increase ( $p <$   
553  $0.001$ ) in clustering coefficient with respect to (750-1000 ms).

554 The local efficiency (**Fig 7D**) of the theta band was increased in experiment 1, factor  
555 condition ( $F_{1,18} = 12.31$ ,  $p = 0.001$ ) and time ( $F_{6,108} = 9.46$ ,  $p < 0.001$ ) and experiment  
556 2, the factor condition ( $F_{1,25} = 14.20$ ,  $p < 0.001$ ) and time ( $F_{6,150} = 9.35$ ,  $p < 0.001$ ),  
557 followed by post-hoc analyses revealed significant difference from the (-250-0 ms) to

558 the intervals (0 to 1500 ms) ( $p < 0.001$  for all time intervals). However, only in  
559 experiment 2 (TMS) a significant increase was detected from (750-1000 ms) to  
560 (1000-1250 ms) ( $p < 0.001$ ). In this community the alpha band did not exhibit any  
561 significant differences for both the experiments in none of the analyzed network  
562 measures. The network measures flexibility, clustering and local efficiency for the  
563 control experiment of single pulse TMS at 80 ms did not change the network  
564 connectivity dynamics for all the three communities as shown in Suppl. Fig.1 between  
565 the baseline (-250-0 ms) and the first time window (0-250 ms).

566

567 **Effective connectivity dynamics.** The dynamical, effective connectivity (**Fig 8-10**)  
568 analyses were focused only on the difference between the two conditions (CS+ and  
569 CS-) and the three newly formed communities. In the baseline time window (-250-0  
570 ms) only information flows that survived surrogate and time reversal technique ( $p <$   
571  $0.001$ ) are reported. In **Fig 8 to 10** the information flow at baseline (-250-0 ms) for the  
572 three networks is shown: red lines for the theta band and blue lines for the alpha  
573 band. Significant changes in the directionality of information flow for experiment time  
574 windows in comparison to the baseline are shown in yellow; the thickness of the lines  
575 indicates the strength of the information flow.

576 In the dorsal attention network (**Fig 8**), the information flow of the baseline window (-  
577 250-0 ms) was similar in both experiments and both frequency bands (theta, alpha).  
578 In this window the information flow was bi-directional and largely restricted to intra-  
579 hemispheric connections with only two inter-hemispheric connections. In the theta  
580 band the connections at (0-250 ms) (immediate after visual stimuli) changed from bi-  
581 directional to uni-directional. The information flows in this band were restricted to  
582 intra-hemispheric connections from occipital to frontal regions in both experiments. At  
583 (1000-1250 ms) fewer connections showed changes but they had increased strength  
584 flow (thicker yellow lines in figure 8), specifically MOG (left) to SFGdor (left), IOG  
585 (left) to SFGdor (left), SOG (right) to ACG (right) and IOG (right) to ACG (right). For  
586 the alpha band, at (0-250 ms) uni-directional connections remain between IOG and  
587 SOG in both hemispheres, and PCG (left) to ANG (left). At the interval (1000-1250  
588 ms) three new connections had increased strength with respect to (750-1000 ms);  
589 SOG (left) to ACG (left), MOG (left) to SFGdor (left) and SOG (right) to ACG (right).

590 In the salience network (**Fig 9**), at baseline (-250-0 ms) of the theta band only bi-  
591 directional connections were observed between the regions; most were intra-  
592 hemispheric except between left and right putamen, in both experiments. At (0-250  
593 ms) the information flow turned uni-directional and intra-hemispheric, with increased  
594 strength flow with respect to baseline (-250-0 ms). In the experiment 1 all remained  
595 connections at (1000-1250 ms) were restricted to the right-hemisphere and exhibited  
596 bi-directional information flow, except from the insula to amygdala. TMS modulation  
597 of the theta band was visible in the experiment 2 at (1000-1250 ms), where the  
598 existing connections turned uni-directional. Connections were from frontal cortex to  
599 the supplementary motor area (SMA) and sub-cortical regions (putamen and  
600 thalamus) and from insula to amygdala.

601 In the alpha band, at baseline (-250-0 ms) the information flow of the salience  
602 network was similar to the theta band, except for an inter-hemispheric connection  
603 between the bilateral thalami. At (0-250 ms) the connection strength was higher in  
604 comparison to the baseline window (-250-0 ms) and only three additional bi-  
605 directional connections remained, whereas four connections turned uni-directional. At  
606 (1000-1250 ms) connections remained in both hemispheres; all were intra-  
607 hemispheric and bi-directional, except from thalamus to the SMA in case of the  
608 experiment 1. In experiment 2 remained connections turned uni-directional, these  
609 were from SFG to MFG, MFG to putamen and thalamus to SMA in both  
610 hemispheres.

611 In the threat network (**Fig 10**) the theta frequency connectivity at baseline (-250-0  
612 ms) showed again only bi-directional connections between the regions; most of them  
613 were intra-hemispheric except between bilateral ORBmid and HIPP, in both  
614 experiments. At (0-250 ms) the information flow of most connections remained bi-  
615 directional and intra-hemispheric, except between bilateral hippocampi, which turned  
616 uni-directional. The strength of the connections was significantly increased with  
617 respect to baseline window (-250-0 ms). At (1000-1250 ms), in the experiment 1 all  
618 connections remained bi-directional and were restricted to the right hemisphere.  
619 Theta band TMS modulation was visible in the experiment 2, where all the  
620 connections turned uni-directional. The connection strength was higher for the  
621 existing connections, except for ORBmid (right) to ORBsupmed (right), which was  
622 weaker at this time window.

623

624 **Correlation between electrophysiological and behavioral indicators of threat**

625 **processing.** Only the significant correlations that survived Bonferroni correction and

626 were attested in both experiments are reported. We found a significant correlation

627 between the frontal theta ITPC positive slope (-250-0 to 250-500 ms) and the heart

628 rate in both experiment 1 ( $r = 0.70$ ;  $p = 0.014$ ) and experiment 2 ( $r = 0.61$ ;  $p = 0.012$ ).

629 A significant correlation was also found between the slope of the windows (-250-0 to

630 0-250 ms) for the network flexibility parameter in the theta band of CS+ stimuli and

631 heart rate in the salience and threat networks, in both experiment 1 ( $r = 0.68$ ;  $p =$

632  $0.003$ ;  $r = 0.56$ ;  $p = 0.005$ ) and experiment 2 ( $r = 0.58$ ;  $p = 0.005$ ;  $r = 0.61$ ;  $p = 0.004$ ).

633 The correlation between the effective connectivity from the time interval (0-250 ms)

634 and the difference in threat ratings were only significant for the salience network;

635 specifically for two connections: INS (left) to AMG (left) ( $r = 0.40$ ;  $p = 0.006$ ) and TH

636 (left) to SMA (left) ( $r = 0.37$ ;  $p = 0.009$ ). The results from correlation analyses

637 between the theta band (0-250 ms) window effective connectivity and the heart rate

638 are listed in **Supplementary Table 2**, for each community and for both experiments.

639 Correlation results between the alpha band (0-250 ms) window effective connectivity

640 and the heart rate are listed in **Supplementary Table 3**, for each community and for

641 both experiments. The correlation results between the theta band (1000-1250 ms)

642 window effective connectivity and the heart rate are listed in **Supplementary Table**

643 **4**, separately for each community and experiments.

644

## 645 **Discussion**

646 Decades of research has attempted to decipher the neurobiological basis of threat

647 processing. In the current study, we demonstrate that a quick shift of cognitive,

648 associative learning and classical conditional mechanisms, mirrored by particular

649 network crosstalk, is needed in order to shape our neurobiological response to

650 aversive stimuli. Up until now, methodological difficulties in quantifying the neural

651 elements of the processing network at high temporal resolution meant that it was not

652 possible to arrive at a personalized non-invasive description of human behavior to

653 threat. The exact characterization of these neurobiological processes is, however,

654 essential for finding therapeutic strategies for affective or stress-related mental

655 disorders. Here we provide compelling evidence of how brain networks respond to

656 threat. We see a unified account of theta band driven network re-organization with  
657 transitions of certain brain regions within the threat, attention and salience circuits  
658 that interact during instructed threat processing. We based the timing of the TMS  
659 pulses to dMPFC on the dynamics of theta driven alterations, which return to  
660 baseline at 1000ms, as shown by inter-trial coherence in the experiment without  
661 TMS. The flexibility of the community structures and the characteristic of forming  
662 local clusters are dynamic network properties that predetermine the physiological  
663 responses to threat. Moreover, we see a time dependent decrease of threat induced  
664 network behavior (increased flexibility and clustering in the threat network), that can  
665 be causally modulated by an applied transcranial magnetic stimulation pulse over  
666 dMPFC 1000 ms after CS+ presentation. A test pulse applied over dMPFC at a time  
667 period not relevant for threat processing interfered significantly with ongoing network  
668 behavior and community restructuring.

669 Furthermore, the specific connection strengths between amygdala and insula or  
670 cortico-cortical identified prior to a subject's involvement in threat processing  
671 predicted the threat response, as measured by heart rate increase or subjective  
672 threat rating. Similarly, the strength of these connections also predicted the dMPFC-  
673 TMS dependent modulation of network behavior and threat processing.

674

675 **Community reorganization through connectivity dynamics is required for threat**  
676 **processing.** Our results show that baseline activity (before CS+ presentation) has  
677 clear functional separation in several communities <sup>47</sup>. However, during threat  
678 processing, the modular topology of these communities was modified, leading to the  
679 formation of three new known networks: DAN, SN and FN. These networks and their  
680 core components have been described as participating in threat and emotional  
681 processing <sup>48</sup>. Restructuring of resting to specific task-related networks therefore  
682 appears to be a primordial mechanism that mediates between perception of relevant  
683 inputs and appropriate subsequent higher-order processing. Our results further  
684 highlight the presence of parallel processing during threat, where the involved  
685 networks (FN, DAN, SN) may distribute separate aspects of high-order cognitive  
686 workflow in order to cope with the situation. Of note, this may differ from the  
687 processing of classical Pavlovian threat conditioning paradigms, since in the  
688 designed paradigm the subjects are previously instructed about the contingency



689 between CS+ and US, so expect the threatening event <sup>49</sup>. This necessitates  
690 recruitment of additional (attentional and control) resources parallel to those in  
691 needed during the conditioned threat responses.

692 Despite our results showing that the interplay between synchrony of  
693 oscillations and network architecture is a key factor to mediate and sustain efficient  
694 information transfer for longer time periods, an open question remains regarding the  
695 state-dependent dynamics of the network, especially its dependency on stimulus  
696 relevance. Here, the network flexibility emerges as a state-dependent parameter of  
697 the threat processing, evidenced by its increase in the three networks. The network  
698 parameter flexibility has been already shown to increase during tasks necessitating  
699 cognitive flexibility <sup>50</sup>, suggesting that dynamic reconfiguration of brain networks  
700 boosts efficient threat processing.

701

#### 702 **Inter-trial coherence as a substrate of threat processing.**

703 We found an increase of the theta inter-trial phase coherence in the frontal lobe and  
704 a simultaneous decrease in the inter-trial phase coherence for the occipital alpha,  
705 relative to stimuli presentation. This suggests that threat processing is not a purely  
706 autonomous response to stimulus presentation, but rather that it facilitates  
707 interactions between regions <sup>51</sup> and for specific temporal conditioned stimuli <sup>52</sup>.  
708 Previous studies on memory function have shown that there is a relationship between  
709 brain response to external stressors and the phase of the synchronized oscillations <sup>3</sup>,  
710 which can be prolonged by exciting a small number of neurons <sup>53</sup> that participate in  
711 such oscillatory behavior. Low-frequency oscillations, such as theta (4–7 Hz) and  
712 alpha (8–12 Hz) can be recorded in different specific anatomical regions and  
713 especially facilitate communication between hippocampus <sup>54</sup>, amygdala <sup>55</sup> and  
714 prefrontal cortex. The specificity of attention in instructed threat studies suggests that  
715 these oscillations provide a temporal window for inter-regional communication <sup>56</sup>.  
716 Intra-regional functional communication has been found for interactions involving the  
717 fronto-occipital circuit during directed attention to visual stimuli <sup>57,58</sup>. It has also  
718 previously been shown that frontal theta phase consistency reflects coordination of  
719 information transfer between distant brain areas <sup>59,60</sup>. On the contrary, the decrease  
720 in the inter-trial phase for the alpha oscillations in the occipital lobe could be related  
721 to alterations due to pre-visual threat processing. Earlier studies <sup>61,62</sup> have shown



722 disruption in phase consistency over successive trials in the occipital lobe, which  
723 suggest that the inter-trial coherence of these oscillations drives the physiological  
724 response during instructed threat processing. Our data support this hypothesis and  
725 localize it differentially in both the frontal and occipital lobes. Here we use the  
726 dynamics of theta driven alterations for the application of TMS pulses to dMPFC, and  
727 apply TMS at a time relevant for threat processing (1000 ms) and a time point before  
728 this (80 ms). Using this approach, we were able to achieve different effects at the  
729 network behavior level. Specifically, a TMS pulse before active processing leads to a  
730 community independent increase of network flexibility and clustering without a  
731 preservation of inter-network interactions. A TMS pulse applied during a time point  
732 physiologically relevant for processing mirrors the network response and  
733 intercommunity information transfer.

734

735

736 **Modulation of information flow directionality is required for threat processing**  
737 **and its corresponding behavioral correlates.**

738 The results presented here further demonstrate causal network dynamics within the  
739 reconfigured networks during threat processing and with TMS pulses. The temporal  
740 changes associated with threat processing are predominantly mediated uni-  
741 directionally, as previously shown in low frequency oscillations of amygdala-  
742 hippocampus connections<sup>63</sup>. More specifically, the network dynamics in the DAN  
743 take a more parietal to frontal uni-directional route during threat processing, which is  
744 in line with previous reports using Pavlovian conditioning paradigms<sup>64</sup>. In the  
745 salience network, the connections also show strong uni-directional connectivity to  
746 threat processing, while TMS facilitates information processing in the regions  
747 composing this network. Moreover, a heightened response of the threat network to  
748 expected threat stimuli has been recently shown using startle responses<sup>65</sup>.  
749 Accordingly, we aimed to test the hypothesis that a targeted modulation of a region of  
750 the threat processing network through TMS pulses can induce similar large-scale  
751 network dynamics<sup>66</sup> modulating reorganization and information flow among distant  
752 regions<sup>67</sup>.

753 Behavioral responses have been shown to be good correlates of induced threat  
754 processing<sup>49,68</sup>. Accordingly, significant increases for the CS+ condition in both

755 threat ratings and heart rate were observed in both of our experiments. Significantly,  
756 however, neither the behavioral ratings nor quantitative heart rate responses were  
757 modulated by TMS pulses. It has been previously shown that local perturbations  
758 should not change the behavioral responses<sup>33,69</sup>. The behavioral indicators  
759 correlated with specific connections in the three newly formed communities which  
760 involved cortical and cortical-subcortical routes. We were also able to validate the  
761 correlations with two experiments for some of the connections, demonstrating that  
762 the changes in the analyzed network dynamics that we observed at the time of  
763 stimulation were purely induced by the TMS.

764

765

## 766 **Conclusions**

767 Our findings demonstrate that threat processing is related to changes in the brain's  
768 modular architecture involving the dorsal attention, salience and threat networks.  
769 Changes in flexibility and local connectivity in these three networks is a prerequisite  
770 for threat processing and related to behavioral responses. The TMS modulated theta  
771 and alpha oscillations, changed the dynamics of network flexibility, and caused a  
772 decrease in the DAN and increase in the SN and FN. The observation of modulation  
773 at both local and global network levels for information directionality and network re-  
774 organization to threat processing and TMS stimulation suggest that these dynamical  
775 phenomena serve as adaptive mechanisms for efficient threat processing.

776

777

778

779

780

781

782

783

784

785

786

787

788 **References**

789

- 790 1 Barrett, L. F. & Satpute, A. B. Large-scale brain networks in affective and social  
791 neuroscience: towards an integrative functional architecture of the brain. *Current*  
792 *opinion in neurobiology* **23**, 361-372 (2013).
- 793 2 Popoli, M., Yan, Z., McEwen, B. S. & Sanacora, G. The stressed synapse: the impact  
794 of stress and glucocorticoids on glutamate transmission. *Nature Reviews Neuroscience*  
795 **13**, 22 (2012).
- 796 3 Gray, M. J., Frey, H.-P., Wilson, T. J. & Foxe, J. J. Oscillatory recruitment of bilateral  
797 visual cortex during spatial attention to competing rhythmic inputs. *Journal of*  
798 *Neuroscience* **35**, 5489-5503 (2015).
- 799 4 Seeley, W. W. *et al.* Dissociable intrinsic connectivity networks for salience  
800 processing and executive control. *Journal of Neuroscience* **27**, 2349-2356 (2007).
- 801 5 Cole, M. W. *et al.* Multi-task connectivity reveals flexible hubs for adaptive task  
802 control. *Nature neuroscience* **16**, 1348 (2013).
- 803 6 Sporns, O. & Betzel, R. F. Modular Brain Networks. *Annu Rev Psychol* **67**, 613-640,  
804 doi:10.1146/annurev-psych-122414-033634 (2016).
- 805 7 Betzel, R. F., Satterthwaite, T. D., Gold, J. I. & Bassett, D. S. Positive affect, surprise,  
806 and fatigue are correlates of network flexibility. *Scientific Reports* **7** (2017).
- 807 8 Dodhia, S. *et al.* Modulation of resting-state amygdala-frontal functional connectivity  
808 by oxytocin in generalized social anxiety disorder. *Neuropsychopharmacology* **39**,  
809 2061 (2014).
- 810 9 Gonzalez-Escamilla, G. *et al.* Excitability regulation in the dorsomedial prefrontal  
811 cortex during sustained instructed fear responses: a TMS-EEG study. *Sci Rep* **8**, 018-  
812 32781 (2018).
- 813 10 Muthuraman, M. *et al.* Cerebello-cortical network fingerprints differ among essential,  
814 Parkinson and mimicked tremors. *Brain*, In-Press (2018).
- 815 11 Courtin, J. *et al.* Prefrontal parvalbumin interneurons shape neuronal activity to drive  
816 fear expression. *Nature* **505**, 92-96, doi:10.1038/nature12755 (2014).
- 817 12 Likhtik, E., Stujenske, J. M., Topiwala, M. A., Harris, A. Z. & Gordon, J. A.  
818 Prefrontal entrainment of amygdala activity signals safety in learned fear and innate  
819 anxiety. *Nature neuroscience* **17**, 106-113, doi:10.1038/nn.3582 (2014).
- 820 13 Taub, A. H., Perets, R., Kahana, E. & Paz, R. Oscillations Synchronize Amygdala-to-  
821 Prefrontal Primate Circuits during Aversive Learning. *Neuron* **97**, 291-298.e293,  
822 doi:10.1016/j.neuron.2017.11.042 (2018).
- 823 14 Chien, J. H. *et al.* Oscillatory EEG activity induced by conditioning stimuli during fear  
824 conditioning reflects Salience and Valence of these stimuli more than Expectancy.  
825 *Neuroscience* **346**, 81-93 (2017).
- 826 15 Balderston, N. L., Hsiung, A., Ernst, M. & Grillon, C. Effect of Threat on Right dlPFC  
827 Activity during Behavioral Pattern Separation. *J Neurosci* **37**, 9160-9171,  
828 doi:10.1523/jneurosci.0717-17.2017 (2017).
- 829 16 Newman, M. E. Modularity and community structure in networks. *Proceedings of the*  
830 *National Academy of Sciences* **103**, 8577-8582 (2006).
- 831 17 Fleischer, V. *et al.* Graph Theoretical Framework of Brain Networks in Multiple  
832 Sclerosis: A Review of Concepts. *Neuroscience* **1**, 30761-30763 (2017).
- 833 18 Bassett, D. S. *et al.* Task-based core-periphery organization of human brain dynamics.  
834 *PLoS computational biology* **9**, e1003171 (2013).

- 835 19 Liu, C. C. *et al.* Fear conditioning is associated with dynamic directed functional  
836 interactions between and within the human amygdala, hippocampus, and frontal lobe.  
837 *Neuroscience* **189**, 359-369 (2011).
- 838 20 LeDoux, J. E. Coming to terms with fear. *Proc Natl Acad Sci U S A* **111**, 2871-2878  
839 (2014).
- 840 21 Anwar, A. R. *et al.* Effective Connectivity of Cortical Sensorimotor Networks During  
841 Finger Movement Tasks: A Simultaneous fNIRS, fMRI, EEG Study. *Brain Topogr.*  
842 **29**, 645-660 (2016).
- 843 22 Chiosa, V. *et al.* Breakdown of thalamo-cortical connectivity precedes spike  
844 generation in focal epilepsies. *Brain Connect* **11** (2017).
- 845 23 Groppa, S. *et al.* A practical guide to diagnostic transcranial magnetic stimulation:  
846 report of an IFCN committee. *Clinical neurophysiology : official journal of the*  
847 *International Federation of Clinical Neurophysiology* **123**, 858-882,  
848 doi:10.1016/j.clinph.2012.01.010 (2012).
- 849 24 Oostenveld, R., Fries, P., Maris, E. & Schoffelen, J. M. FieldTrip: Open source  
850 software for advanced analysis of MEG, EEG, and invasive electrophysiological data.  
851 *Computational intelligence and neuroscience* **2011**, 156869,  
852 doi:10.1155/2011/156869 (2011).
- 853 25 Milad, M. R., Rauch, S. L., Pitman, R. K. & Quirk, G. J. Fear extinction in rats:  
854 implications for human brain imaging and anxiety disorders. *Biol Psychol* **73**, 61-71  
855 (2006).
- 856 26 Palazzo, E., Fu, Y., Ji, G., Maione, S. & Neugebauer, V. Group III mGluR7 and  
857 mGluR8 in the amygdala differentially modulate nocifensive and affective pain  
858 behaviors. *Neuropharmacology* **55**, 537-545 (2008).
- 859 27 Muthuraman, M., Galka, A., Deuschl, G., Heute, U. & Raethjen, J. Dynamical  
860 correlation of non-stationary signals in time domain--A comparative study.  
861 *Biomedical Signal Processing and Control* **5**, 205-213, doi:DOI:  
862 10.1016/j.bspc.2010.02.006 (2010).
- 863 28 Pollak, H. O. & Slepian, D. Prolate spheroidal wave functions, Fourier analysis and  
864 uncertainty, I. *Bell system Technical Journal* **40**, 43-64 (1961).
- 865 29 Wolters, C. H., Anwander, A., Berti, G. & Hartmann, U. Geometry-adapted  
866 hexahedral meshes improve accuracy of finite-element-method-based EEG source  
867 analysis. *IEEE transactions on bio-medical engineering* **54**, 1446-1453 (2007).
- 868 30 Muthuraman, M. *et al.* Oscillating central motor networks in pathological tremors and  
869 voluntary movements. What makes the difference? *Neuroimage* **60**, 1331-1339,  
870 doi:<http://dx.doi.org/10.1016/j.neuroimage.2012.01.088> (2012).
- 871 31 Muthuraman, M. *et al.* Cerebello-cortical network fingerprints differ among essential,  
872 Parkinson and mimicked tremors. *Brain*, In Press (2018).
- 873 32 Van Veen, B. D., van Drongelen, W., Yuchtman, M. & Suzuki, A. Localization of  
874 brain electrical activity via linearly constrained minimum variance spatial filtering.  
875 *IEEE transactions on bio-medical engineering* **44**, 867-880, doi:10.1109/10.623056  
876 (1997).
- 877 33 Gollo, L. L., Roberts, J. A. & Cocchi, L. Mapping how local perturbations influence  
878 systems-level brain dynamics. *NeuroImage* **24**, 30066-30066 (2017).
- 879 34 Muthuraman, M. *et al.* Beamformer source analysis and connectivity on concurrent  
880 EEG and MEG data during voluntary movements. *PLoS One* **9**, e91441,  
881 doi:10.1371/journal.pone.0091441 (2014).
- 882 35 Rubinov, M. & Sporns, O. Complex network measures of brain connectivity: uses and  
883 interpretations. *Neuroimage* **52**, 1059-1069 (2010).

- 884 36 Cravo, A. M., Rohenkohl, G., Wyart, V. & Nobre, A. C. Temporal expectation  
885 enhances contrast sensitivity by phase entrainment of low-frequency oscillations in  
886 visual cortex. *J Neurosci* **33**, 4002-4010 (2013).
- 887 37 Spaak, E., de Lange, F. P. & Jensen, O. Local entrainment of alpha oscillations by  
888 visual stimuli causes cyclic modulation of perception. *Journal of Neuroscience* **34**,  
889 3536-3544 (2014).
- 890 38 Blondel, V. D. G., Jean-Loup; Lambiotte, Renaud; Lefebvre, Etienne. Fast unfolding  
891 of communities in large networks. *Journal of Statistical Mechanics: Theory and*  
892 *Experiment*, 10008, doi:10.1088/1742-5468/2008/10/P10008 (2008).
- 893 39 Ritchey, M., Yonelinas, A. P. & Ranganath, C. Functional connectivity relationships  
894 predict similarities in task activation and pattern information during associative  
895 memory encoding. *J Cogn Neurosci* **26**, 1085-1099, doi:10.1162/jocn\_a\_00533  
896 (2014).
- 897 40 Watts, D. J. & Strogatz, S. H. Collective dynamics of  $\wedge$  'small-world' networks. *Nature*  
898 **393**, 440-442 (1998).
- 899 41 Cravo, A. M., Rohenkohl, G., Wyart, V. & Nobre, A. C. Endogenous modulation of  
900 low frequency oscillations by temporal expectations. *J Neurophysiol* **106**, 2964-2972  
901 (2011).
- 902 42 Muthuraman, M. *et al.* Structural Brain Network Characteristics Can Differentiate CIS  
903 from Early RRMS. *Frontiers in neuroscience* **10**, 14, doi:10.3389/fnins.2016.00014  
904 (2016).
- 905 43 Wan, E. A. & Nelson, A. T. Dual extended Kalman filter methods. *Kalman filtering*  
906 *and neural networks*, 123-173 (2001).
- 907 44 Kaminski, M., Ding, M., Truccolo, W. A. & Bressler, S. L. Evaluating causal relations  
908 in neural systems: granger causality, directed transfer function and statistical  
909 assessment of significance. *Biological cybernetics* **85**, 145-157 (2001).
- 910 45 Arnold, N. & Tapio, S. Vol. 27 27-57 (ACM, 2001).
- 911 46 Haufe, S., Nikulin, V. V., Muller, K. R. & Nolte, G. A critical assessment of  
912 connectivity measures for EEG data: a simulation study. *Neuroimage* **64**, 120-133,  
913 doi:10.1016/j.neuroimage.2012.09.036 (2013).
- 914 47 Xu, Y., Lin, Q., Han, Z., He, Y. & Bi, Y. Intrinsic functional network architecture of  
915 human semantic processing: Modules and hubs. *NeuroImage* **132**, 542-555 (2016).
- 916 48 Menon, V. *Saliency network*. (2015).
- 917 49 Mechias, M. L., Etkin, A. & Kalisch, R. A meta-analysis of instructed fear studies:  
918 implications for conscious appraisal of threat. *NeuroImage* **49**, 1760-1768 (2010).
- 919 50 Mattar, M. G., Betzel, R. F. & Bassett, D. S. The flexible brain. *Brain* **139**, 2110-2112  
920 (2016).
- 921 51 Fiebelkorn, I. C. *et al.* Ready, Set, Reset: Stimulus-Locked Periodicity in Behavioral  
922 Performance Demonstrates the Consequences of Cross-Sensory Phase Reset. *The*  
923 *Journal of Neuroscience* **31**, 9971, doi:10.1523/JNEUROSCI.1338-11.2011 (2011).
- 924 52 Gonzalez-Escamilla, G. *et al.* Excitability regulation in the dorsomedial prefrontal  
925 cortex during sustained instructed fear responses: a TMS-EEG study. *Brain*  
926 *Stimulation*, doi:<http://dx.doi.org/10.1101/277806> (2018).
- 927 53 Stroh, A. *et al.* Making waves: initiation and propagation of corticothalamic Ca<sup>2+</sup>  
928 waves in vivo. *Neuron* **77**, 1136-1150 (2013).
- 929 54 Buzsáki, G. & Moser, E. I. Memory, navigation and theta rhythm in the hippocampal-  
930 entorhinal system. *Nature neuroscience* **16**, 130-138 (2013).
- 931 55 Pape, H.-C. & Driesang, R. B. Ionic mechanisms of intrinsic oscillations in neurons of  
932 the basolateral amygdaloid complex. *J Neurophysiol* **79**, 217-226 (1998).



- 933 56 Likhtik, E. & Gordon, J. A. Circuits in sync: decoding theta communication in fear  
934 and safety. *Neuropsychopharmacology: official publication of the American College*  
935 *of Neuropsychopharmacology* **39**, 235-236 (2014).
- 936 57 Corbetta, M. & Shulman, G. L. Control of goal-directed and stimulus-driven attention  
937 in the brain. *Nature Reviews Neuroscience* **3**, 201-215 (2002).
- 938 58 Fox, M. D., Corbetta, M., Snyder, A. Z., Vincent, J. L. & Raichle, M. E. Spontaneous  
939 neuronal activity distinguishes human dorsal and ventral attention systems.  
940 *Proceedings of the National Academy of Sciences* **103**, 10046-10051 (2006).
- 941 59 Papenberg, G., Hämmerer, D., Müller, V., Lindenberger, U. & Li, S.-C. Lower theta  
942 inter-trial phase coherence during performance monitoring is related to higher reaction  
943 time variability: a lifespan study. *NeuroImage* **83**, 912-920 (2013).
- 944 60 Cavanagh, J. F., Figueroa, C. M., Cohen, M. X. & Frank, M. J. Frontal theta reflects  
945 uncertainty and unexpectedness during exploration and exploitation. *Cereb Cortex* **22**,  
946 2575-2586 (2012).
- 947 61 Ponjavic-Conte, K. D., Hambrook, D. A., Pavlovic, S. & Tata, M. S. Dynamics of  
948 distraction: competition among auditory streams modulates gain and disrupts inter-  
949 trial phase coherence in the human electroencephalogram. *PLoS One* **8**, e53953  
950 (2013).
- 951 62 Tiitinen, H. *et al.* Selective attention enhances the auditory 40-Hz transient response in  
952 humans. *Nature* **364**, 59-60 (1993).
- 953 63 Zheng, J. *et al.* Amygdala-hippocampal dynamics during salient information  
954 processing. *Nature Communications* **8**, 14413 (2017).
- 955 64 Zidda, F. *et al.* Default mode network connectivity of fear- and anxiety-related cue  
956 and context conditioning. *NeuroImage* **16**, 30851-30850 (2017).
- 957 65 Sarapas, C., Weinberg, A., Langenecker, S. A. & Shankman, S. A. Relationships  
958 among attention networks and physiological responding to threat. *Brain Cogn* **111**, 63-  
959 72 (2017).
- 960 66 Bortoletto, M., Veniero, D., Thut, G. & Miniussi, C. The contribution of TMS-EEG  
961 coregistration in the exploration of the human cortical connectome. *Neurosci Biobehav*  
962 *Rev* **49**, 114-124 (2015).
- 963 67 Ruff, C. C. *et al.* Concurrent TMS-fMRI and psychophysics reveal frontal influences  
964 on human retinotopic visual cortex. *Curr Biol* **16**, 1479-1488 (2006).
- 965 68 Maier, S. *et al.* Clarifying the role of the rostral dmPFC/dACC in fear/anxiety:  
966 learning, appraisal or expression? *PLoS One* **7**, 26 (2012).
- 967 69 Kaess, M. *et al.* Stress vulnerability in male youth with Internet Gaming Disorder.  
968 *Psychoneuroendocrinology* **77**, 244-251 (2017).
- 969  
970  
971  
972  
973  
974  
975  
976  
977  
978  
979  
980  
981  
982

983 **Figure Legends:**

984

985 **Figure 1:**

986

987 Figure 1: The schematic figure for the instructed threat paradigm used in this study.  
988 A) Shows the symbols which were used, when the circle was presented, there was a  
989 30% probability of shock, whereas the square had no probability of shocks. B) Gives  
990 an example of the temporal scale of the stimuli presentation, each symbol was  
991 presented for 5 seconds, and after either 80 ms or 1 second a neuronavigated single  
992 pulse TMS was applied to the right dorsomedial prefrontal cortex (dmPFC). Followed  
993 by a fixation cross with an inter-stimulus interval of (5-10) seconds and continued  
994 with either CS+ or CS- stimuli in a random manner.  
995

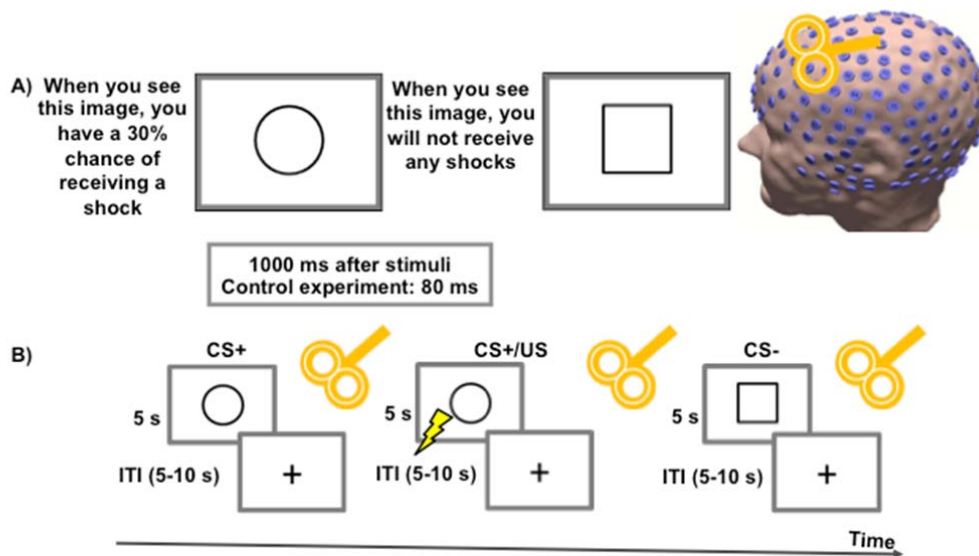

996

997 **Figure 2:**

998

999 The behavioral stress ratings mean and standard deviation for both the experiments  
1000 are shown in A) and the heart rate mean and standard deviation for both the  
1001 experiments are shown in B). The dark grey bar represents the CS+ stimuli and the  
1002 light grey bar represents the CS- stimuli. The dashed line indicates the significant  
1003 difference between the two stimuli.  
1004



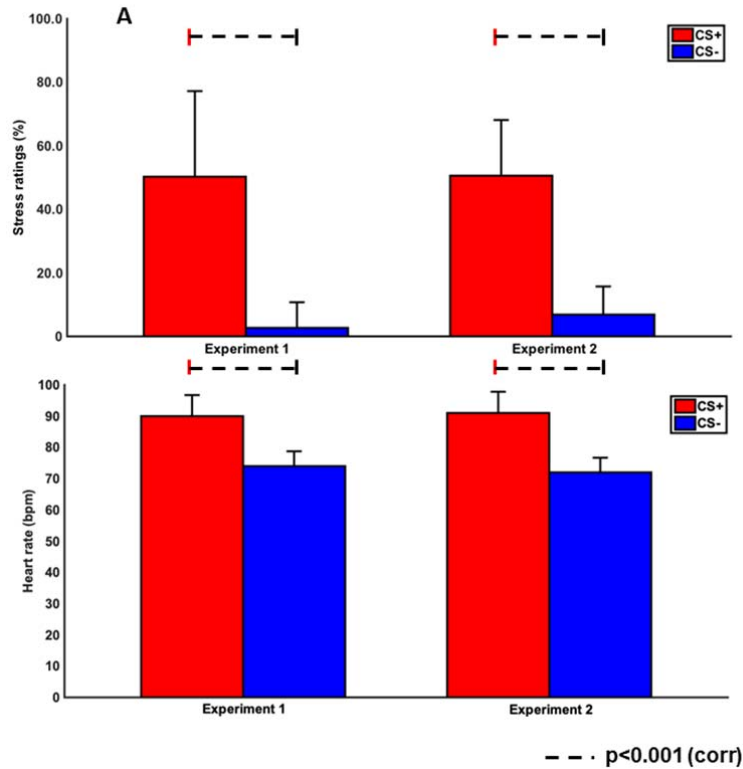

1005  
1006  
1007  
1008  
1009  
1010  
1011  
1012  
1013  
1014  
1015  
1016

**Figure 3:**

A) Shows the subdivision of the lobes for the estimation of the inter-trial phase coherence. B) First row shows the frontal inter-trial phase coherence (ITPC) for both the experiments and time windows, starting from the baseline (-250 to 0 ms) followed by six time windows (T1-T6) each 250 ms, the second row shows the occipital ITPC. The dashed black line indicates the significant differences and the red vertical line indicates the window to which the comparison was done. The black boxes in B) indicate the change in ITPC between the experiment 1 and experiment 2. The TMS coil indicates the time of application of single pulse TMS.

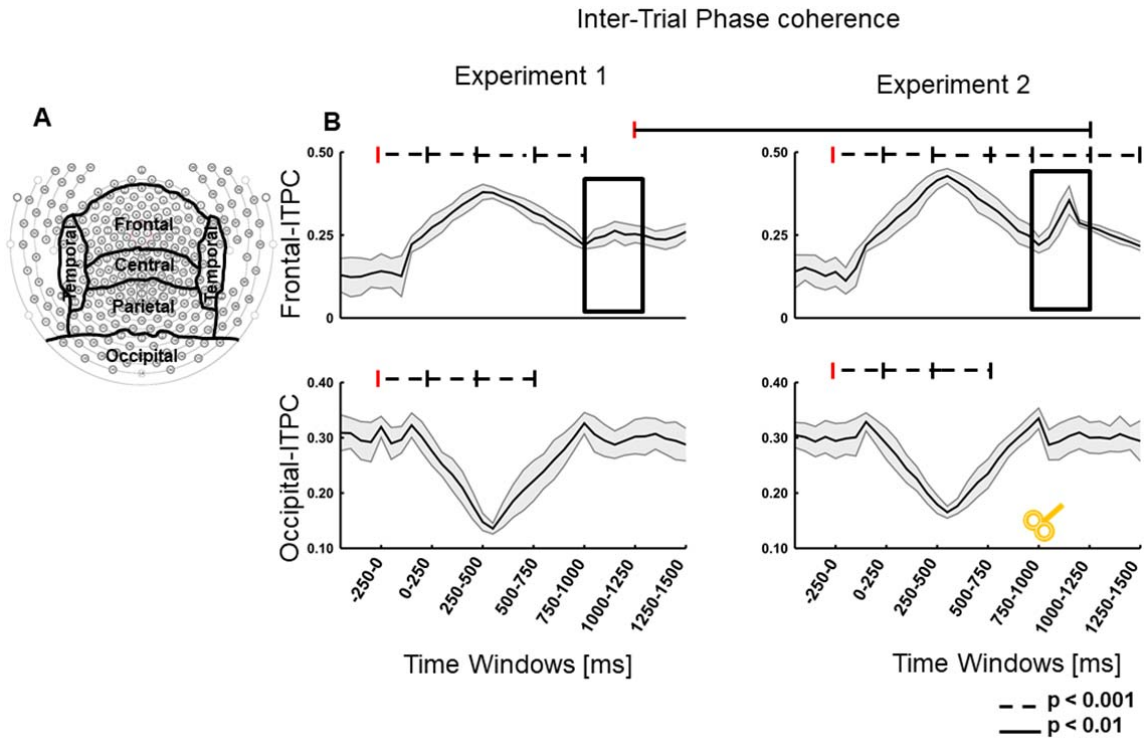

1017  
1018  
1019  
1020  
1021  
1022  
1023  
1024  
1025  
1026

**Figure 4:**

Shows the identified nine communities from (M1 to M9) at the baseline time window (-250 to 0) ms. The community 1 comprise of mainly frontal regions. The community 2 includes basal ganglia; community 3 and community 7 encompassed fronto-parietal regions. Community 4 and community 5 include parietal and occipital regions; community 6 includes temporal regions. Community 9 comprised of hippocampus and amygdala and community 8 included central regions.

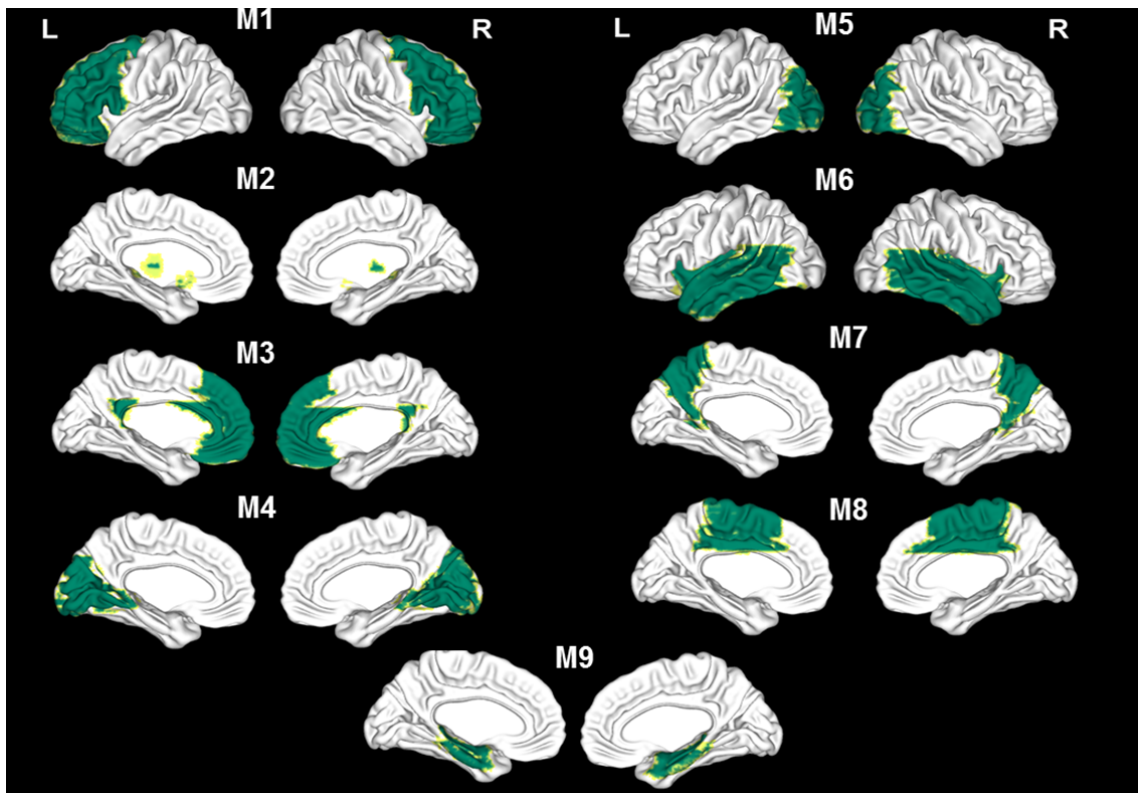

1027  
1028  
1029  
1030  
1031  
1032  
1033  
1034  
1035  
1036  
1037  
1038  
1039

**Figure 5:**

In A) the representative figure with regions comprised in the newly formed dorsal attention network (DAN), the corresponding list is given in Supplementary Table 1. The network parameter flexibility is shown in B) starting from the baseline (-250 to 0) ms window to all the following six time windows (T1-T6) for every 250 ms separately bar plots with mean and standard deviation for theta and alpha frequency bands. C) and D) show the values for the clustering coefficient and the local efficiency. The red line indicates the significant differences between the time intervals all the intervals were compared to the baseline. The interval (750-1000) ms were compared to the (1000-1250) ms.

Network flexibility during threat

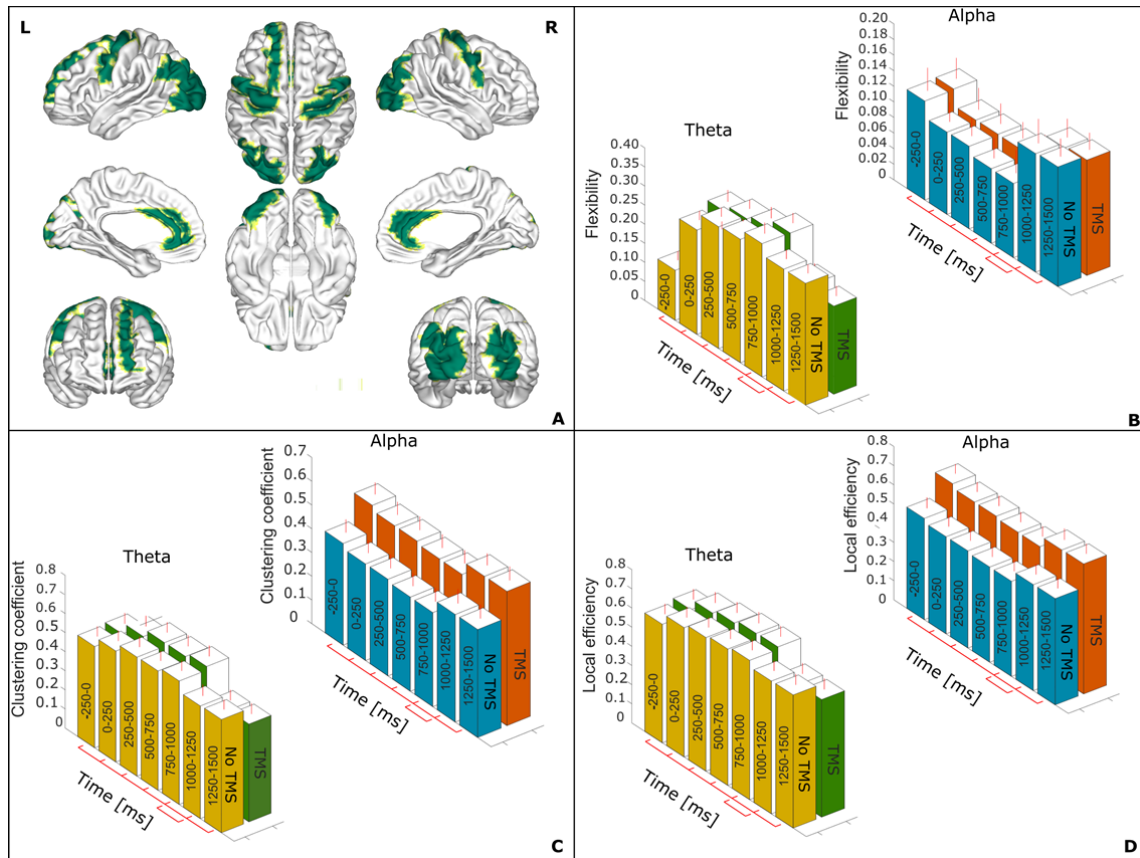

1040  
1041  
1042  
1043  
1044  
1045  
1046  
1047  
1048  
1049  
1050  
1051  
1052  
1053

**Figure 6:**

In A) the representative figure with regions comprised in the newly formed Saliency network (SN), the corresponding list is given in Supplementary Table 1. The network parameter flexibility is shown in B) starting from the baseline (-250 to 0) ms window to all the following six time windows (T1-T6) for every 250 ms separately bar plots with mean and standard deviation for theta and alpha frequency bands. C) and D) show the values for the clustering coefficient and the local efficiency. The red line indicates the significant differences between the time intervals all the intervals were compared to the baseline. The interval (750-1000) ms were compared to the (1000-1250) ms.

Network flexibility during threat

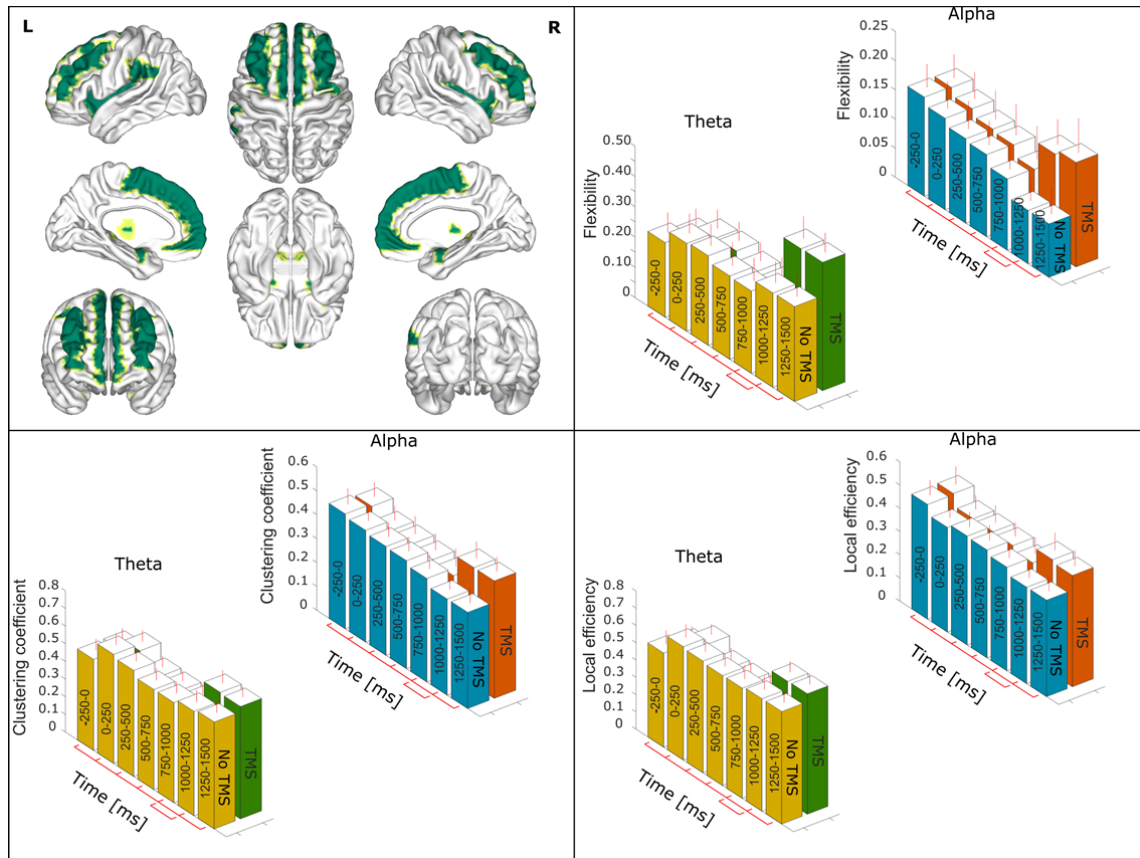

1054  
1055  
1056  
1057  
1058  
1059  
1060  
1061  
1062  
1063  
1064  
1065  
1066

**Figure 7:**

In A) the representative figure with regions comprised in the newly formed threat network (TN), the corresponding list is given in Supplementary Table 1. The network parameter flexibility is shown in B) starting from the baseline (-250 to 0) ms window to all the following six time windows (T1-T6) for every 250 ms separately bar plots with mean and standard deviation for theta and alpha frequency bands. C) and D) show the values for the clustering coefficient and the local efficiency. The red line indicates the significant differences between the time intervals all the intervals were compared to the baseline. The interval (750-1000) ms were compared to the (1000-1250) ms.

Network flexibility during threat

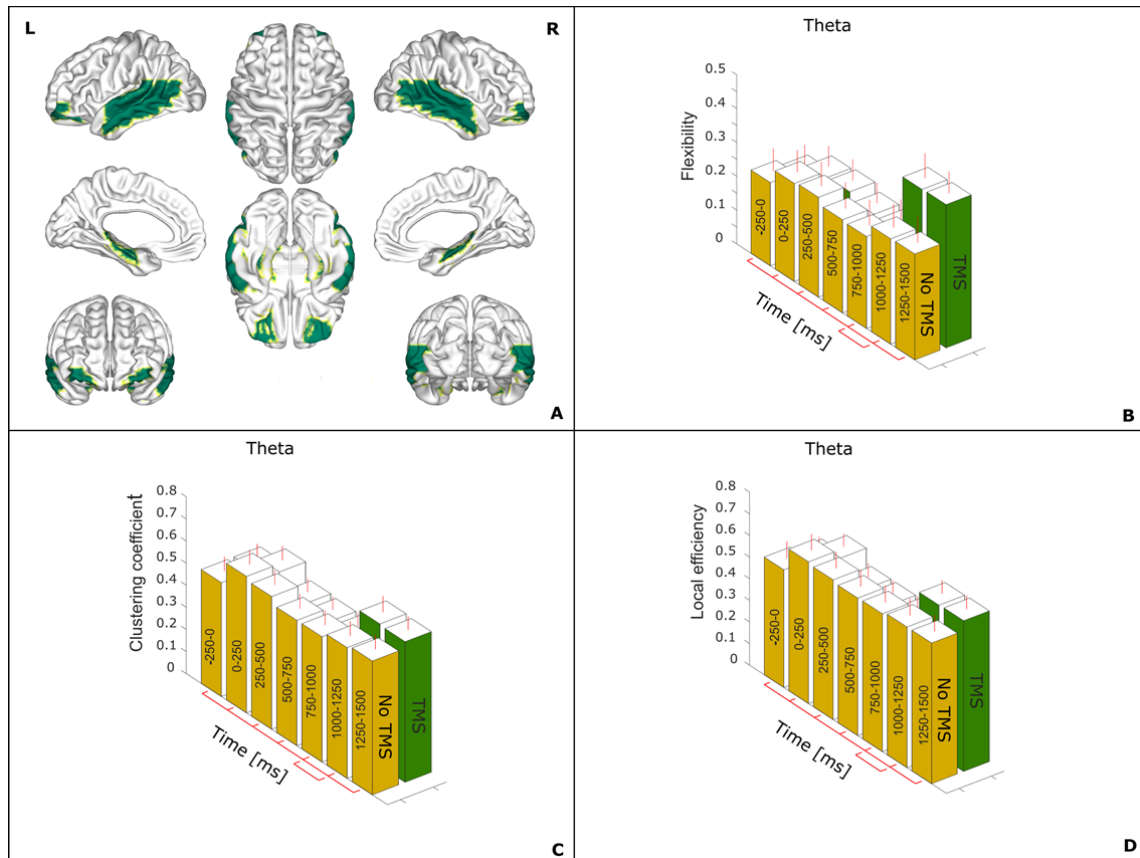

1067  
1068  
1069  
1070  
1071  
1072  
1073  
1074  
1075  
1076  
1077  
1078  
1079  
1080  
1081  
1082  
1083

**Figure 8:**

The temporal partial directed coherence (TPDC) information flow between the regions in the dorsal attention network (DAN) are shown in the template brain showing the 9 communities in different colors and the 6676 voxels. The first two rows for the theta and the last two rows for the alpha frequency band separately. The first and third row represents the experiment 1 and the second and fourth row the experiment 2. The red arrows indicate the information flow during the baseline window (-250 to 0) ms and the yellow lines indicates the difference in the information flow to the previous time window and the thickness of the lines indicates the strength of the information flow when compared to the previous time window. *L: Left; R: Right; SFGdor: Superior frontal Gyrus, dorsolateral; ACG: Anterior Cingulate Gyrus; SOG: Superior Occipital Gyrus; MOG: Middle Occipital Gyrus; IOG: Inferior Occipital Gyrus; PCG: Posterior Cingulate Gyrus; ANG: Angular Gyrus;*



Network flexibility during threat

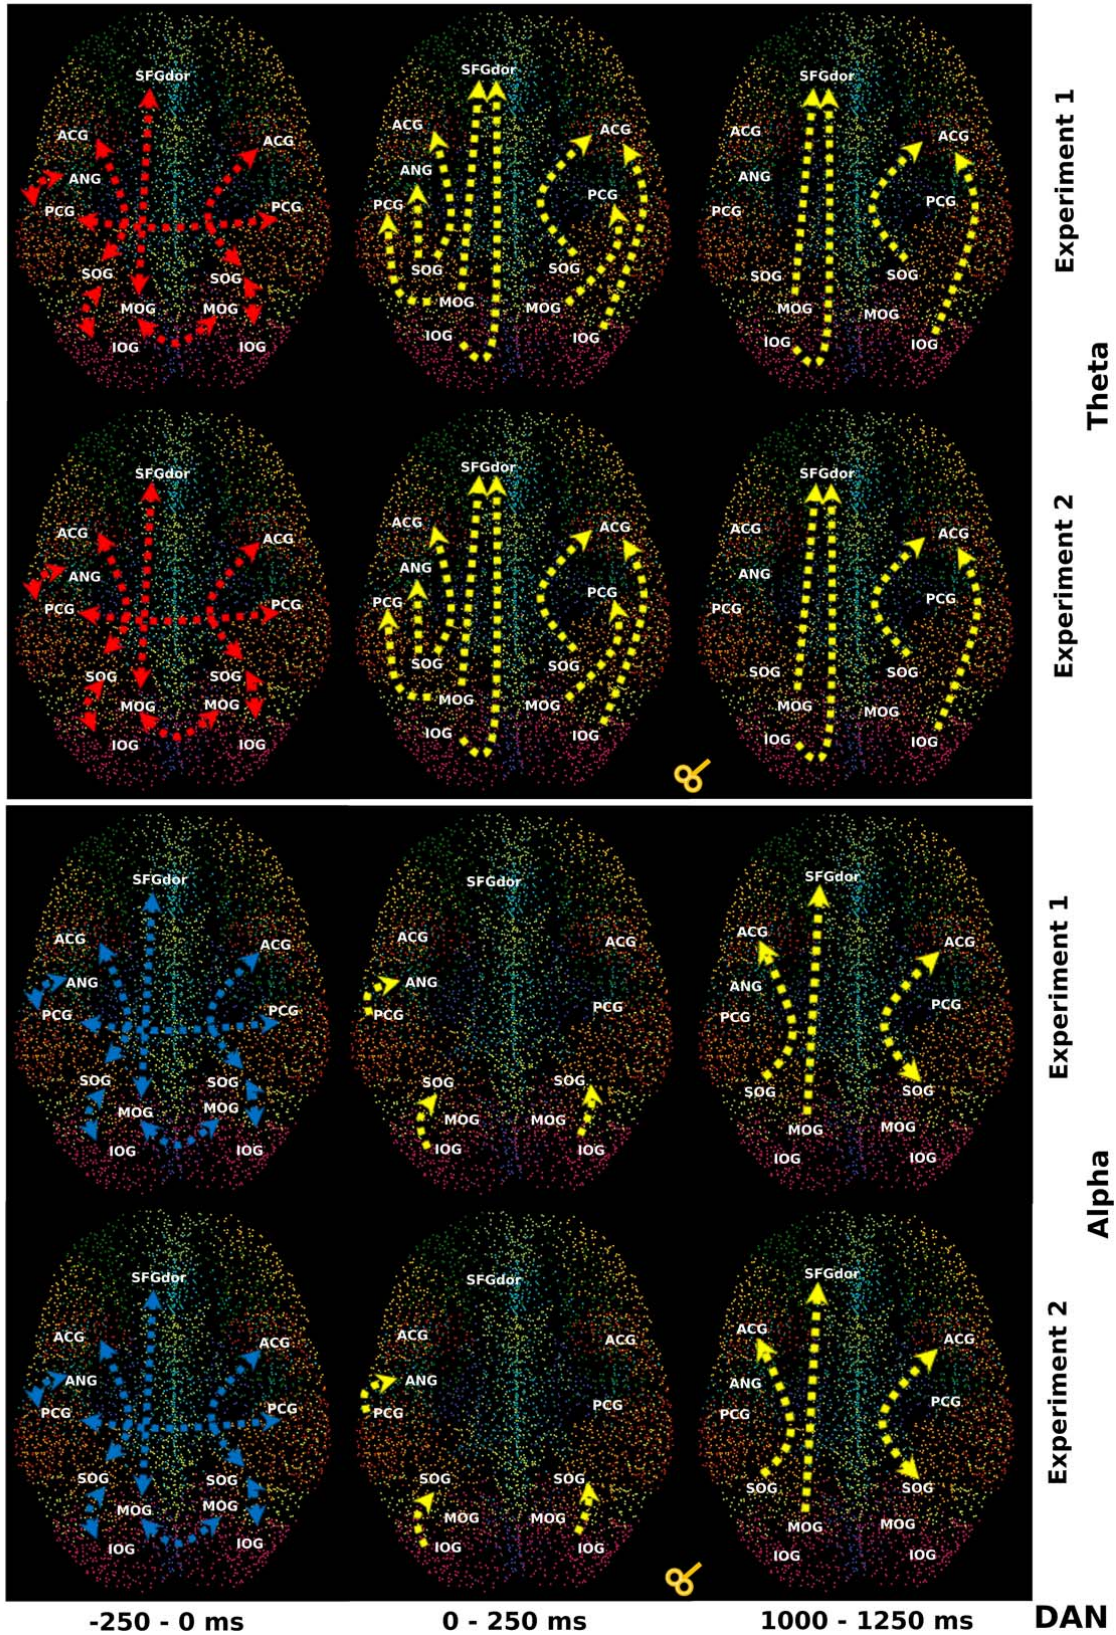

1084  
1085  
1086



1087 **Figure 9:**

1088

1089 The temporal partial directed coherence (TPDC) information flow between the  
1090 regions in the salience network (SN) are shown in the template brain showing the 9  
1091 communities in different colors and the 6676 voxels. The first two rows for the theta  
1092 and the last two rows for the alpha frequency band separately. The first and third row  
1093 represents the experiment 1 and the second and fourth row the experiment 2. The  
1094 red arrows indicate the information flow during the baseline window (-250 to 0) ms  
1095 and the yellow lines indicates the difference in the information flow to the previous  
1096 time window and the thickness of the lines indicates the strength of the information  
1097 flow when compared to the previous time window. The red box indicates the  
1098 difference in information flow between experiment and experiment 2. *L: Left; R: Right;*  
1099 *MFG: Middle Frontal Gyrus; SMA: Supplementary Motor Area; INS: Insula; AMYG:*  
1100 *Amygdala; SMG: Supramarginal Gyrus; PUT: Putamen; THA: Thalamus; SFGmed:*  
1101 *Superior Frontal Gyrus, Medial;*  
1102

Network flexibility during threat

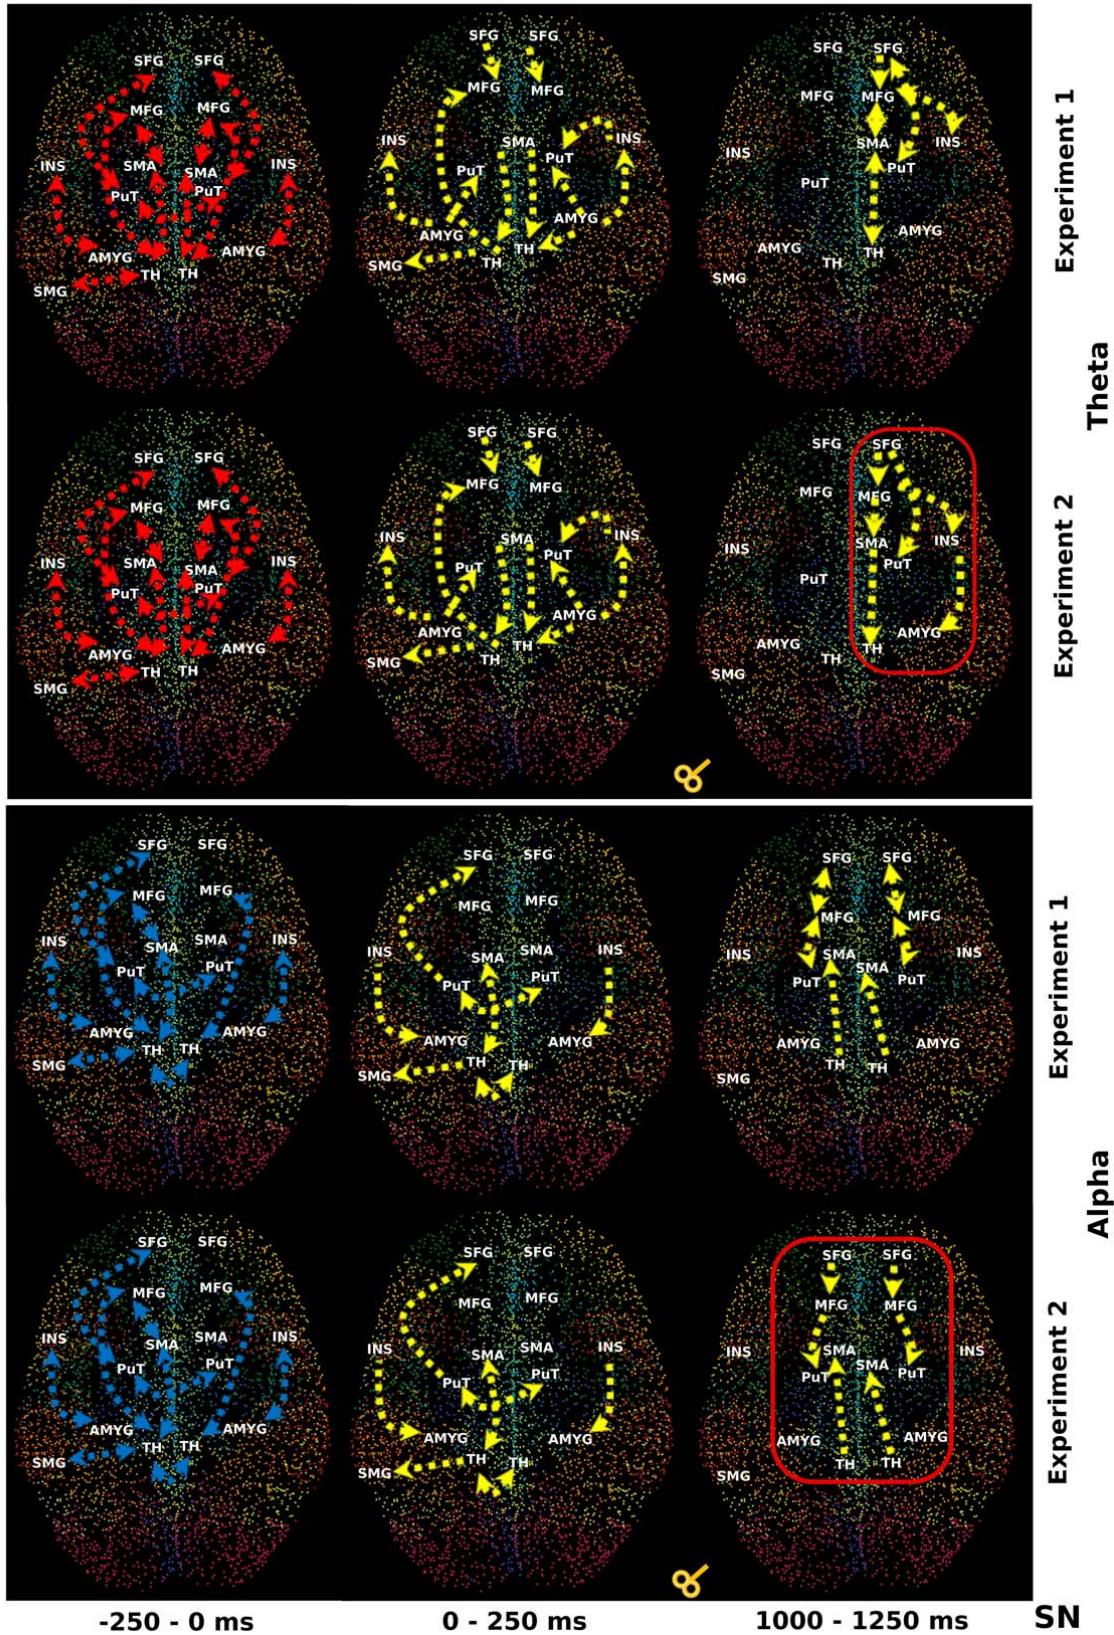

1103  
1104  
1105



1106 **Figure 10:**

1107

1108 The temporal partial directed coherence (TPDC) information flow between the  
 1109 regions in the threat network (TN) are shown in the template brain showing the 9  
 1110 communities in different colors and the 6676 voxels. The first two rows for the theta  
 1111 and the last two rows for the alpha frequency band separately. The first and third row  
 1112 represents the experiment 1 and the second and fourth row the experiment 2. The  
 1113 red arrows indicate the information flow during the baseline window (-250 to 0) ms  
 1114 and the yellow lines indicates the difference in the information flow to the previous  
 1115 time window and the thickness of the lines indicates the strength of the information  
 1116 flow when compared to the previous time window. The red box indicates the  
 1117 difference in information flow between experiment and experiment 2. L: Left; R: Right;  
 1118 HIPP: Hippocampus; STG: Superior Temporal Gyrus; MTG: Middle Temporal Gyrus;  
 1119 ORBsupmed: Superior Frontal Gyrus, medial orbital; ORBmid: Middle Frontal Gyrus,  
 1120 orbital part;

1121

1122

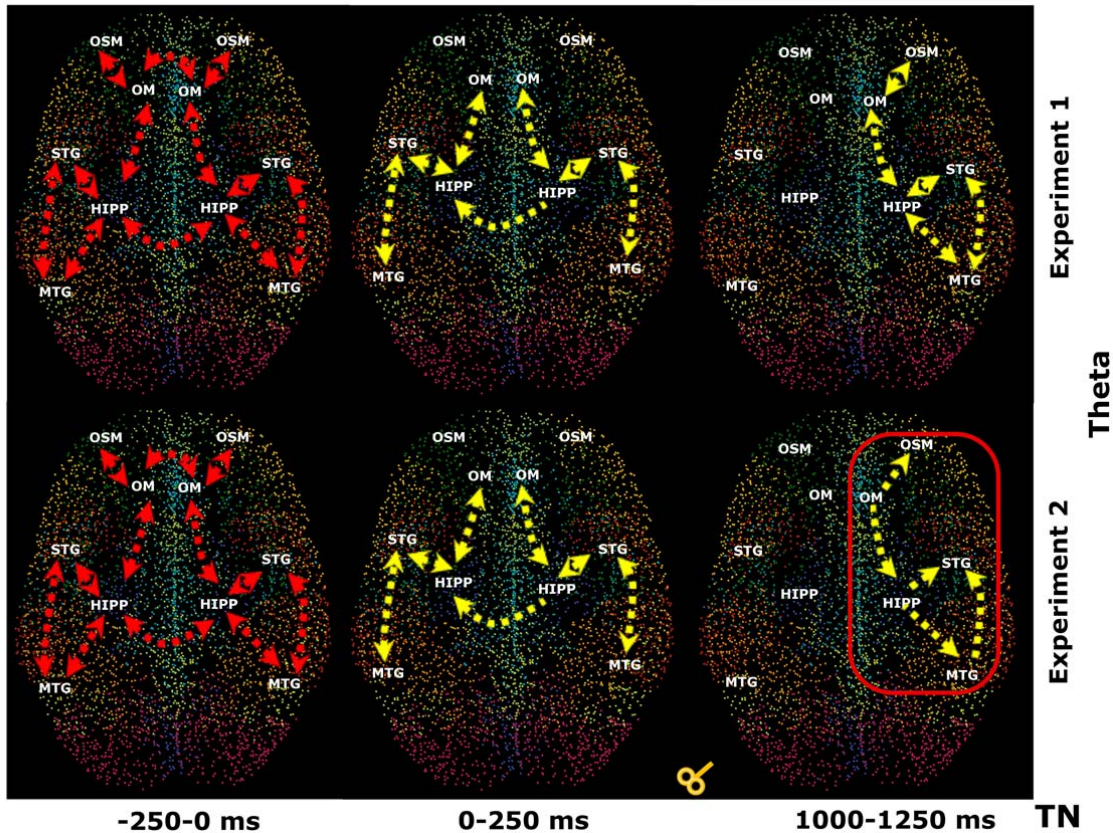

1123

1124

1125
